# Early Pleistocene enamel proteome sequences from Dmanisi resolve *Stephanorhinus* phylogeny

Enrico Cappellini<sup>1</sup>, Frido Welker<sup>2,3</sup>, Luca Pandolfi<sup>4</sup>, Jazmin Ramos Madrigal<sup>2</sup>, Anna K. Fotakis<sup>2</sup>, David Lyon<sup>5</sup>, Victor J. Moreno Mayar<sup>1</sup>, Maia Bukhsianidze<sup>6</sup>, Rosa Rakownikow Jersie-Christensen<sup>5</sup>, Meaghan Mackie<sup>2,5</sup>, Aurélien Ginolhac<sup>7</sup>, Reid Ferring<sup>8</sup>, Martha Tappen<sup>9</sup>, Eleftheria Palkopoulou<sup>10</sup>, Diana Samodova<sup>5</sup>, Patrick L. Rütter<sup>5</sup>, Marc R. Dickinson<sup>11</sup>, Tom Stafford<sup>12</sup>, Yvonne L. Chan<sup>13</sup>, Anders Götherström<sup>14</sup>, Senthilvel KSS Nathan<sup>15</sup>, Peter D. Heintzman<sup>16</sup>, Joshua D. Kapp<sup>16</sup>, Irina Kirillova<sup>17</sup>, Yoshan Moodley<sup>18</sup>, Jordi Agustí<sup>19,20</sup>, Ralf-Dietrich Kahlke<sup>21</sup>, Gocha Kiladze<sup>6</sup>, Bienvenido Martínez–Navarro<sup>19,20,22</sup>, Shanlin Liu<sup>1,23</sup>, Marcela Sandoval Velasco<sup>2</sup>, Mikkel-Holger S. Sinding<sup>1,24</sup>, Christian D. Kelstrup<sup>5</sup>, Morten E. Allentoft<sup>1</sup>, Anders Krogh<sup>25</sup>, Ludovic Orlando<sup>26,1</sup>, Kirsty Penkman<sup>11</sup>, Beth Shapiro<sup>16</sup>, Lorenzo Rook<sup>4</sup>, Love Dalén<sup>13</sup>, M. Thomas P. Gilbert<sup>1,27</sup>, Jesper V. Olsen<sup>5</sup>, David Lordkipanidze<sup>6</sup>, Eske Willerslev<sup>1,28,29</sup>

<sup>1</sup> Centre for GeoGenetics, Natural History Museum of Denmark, University of Copenhagen, Denmark.

<sup>2</sup> Natural History Museum of Denmark, University of Copenhagen, Denmark.

<sup>3</sup> Department of Human Evolution, Max Planck Institute for Evolutionary Anthropology, Germany.

<sup>4</sup> Dipartimento di Scienze della Terra, University of Firenze, Italy.

<sup>5</sup> Novo Nordisk Foundation Center for Protein Research, University of Copenhagen, Denmark.

<sup>6</sup> Georgian National Museum, Tbilisi, Georgia.

<sup>7</sup> Life Sciences Research Unit, University of Luxembourg, Luxembourg.

<sup>8</sup> Department of Geography and Environment, University of North Texas, USA.

<sup>9</sup> Department of Anthropology, University of Minnesota, USA.

<sup>10</sup> Department of Genetics, Harvard Medical School, USA.

<sup>11</sup> Department of Chemistry, University of York, UK.

<sup>12</sup> Stafford Research LLC, Lafayette, USA.

<sup>13</sup> Department of Bioinformatics and Genetics, Swedish Museum of Natural History, Stockholm, Sweden.

<sup>14</sup> Department of Archaeology and Classical Studies, Stockholm University, Stockholm, Sweden.

<sup>15</sup> Sabah Wildlife Department, Kota Kinabalu, Malaysia.

<sup>16</sup> Department of Ecology and Evolutionary Biology, University of California Santa Cruz, USA.

<sup>17</sup> National Alliance of Shidlovskiy "Ice Age", Moscow, Russia.

<sup>18</sup> Department of Zoology, University of Venda, South Africa.

<sup>19</sup> Institut Català de Paleoecologia Humana i Evolució Social, Universitat Rovira i Virgili, Spain.

<sup>20</sup> Institució Catalana de Recerca i Estudis Avançats (ICREA)

<sup>21</sup> Department of Quaternary Palaeontology, Senckenberg Research Institute, Germany.

<sup>22</sup> Departament d'Història i Geografia, Universitat Rovira i Virgili, Spain.

<sup>23</sup> BGI Shenzhen, Shenzhen, China

<sup>24</sup> Greenland Institute of Natural Resources, Nuuk, Greenland.

<sup>25</sup> The Bioinformatics Centre, Department of Biology, University of Copenhagen, Denmark.

<sup>26</sup> Laboratoire d'Anthropobiologie Moléculaire et d'Imagerie de Synthèse, Université de Toulouse, Université Paul Sabatier, France.

45 <sup>27</sup> University Museum, Norwegian University of Science and Technology, Norway.

46 <sup>28</sup> Department of Zoology, University of Cambridge, UK.

47 <sup>29</sup> Wellcome Trust Sanger Institute, Hinxton, UK.

48

49

50 Correspondence and requests for material should be addressed to E.C. ([ecappellini@snm.ku.dk](mailto:ecappellini@snm.ku.dk)) or

51 E.W. ([ewillerslev@snm.ku.dk](mailto:ewillerslev@snm.ku.dk)).

52

## 53 ABSTRACT

54

55 Ancient DNA (aDNA) sequencing has enabled unprecedented reconstruction of speciation,  
56 migration, and admixture events for extinct taxa<sup>1</sup>. Outside the permafrost, however, irreversible  
57 aDNA post-mortem degradation<sup>2</sup> has so far limited aDNA recovery within the ~0.5 million years (Ma)  
58 time range<sup>3</sup>. Tandem mass spectrometry (MS)-based collagen type I (COL1) sequencing provides  
59 direct access to older biomolecular information<sup>4</sup>, though with limited phylogenetic use. In the  
60 absence of molecular evidence, the speciation of several Early and Middle Pleistocene extinct  
61 species remain contentious. In this study, we address the phylogenetic relationships of the Eurasian  
62 Pleistocene Rhinocerotidae<sup>5-7</sup> using ~1.77 million years (Ma) old dental enamel proteome sequences  
63 of a *Stephanorhinus* specimen from the Dmanisi archaeological site in Georgia (South Caucasus)<sup>8</sup>.  
64 Molecular phylogenetic analyses place the Dmanisi *Stephanorhinus* as a sister group to the woolly  
65 (*Coelodonta antiquitatis*) and Merck's rhinoceros (*S. kirchbergensis*) clade. We show that  
66 *Coelodonta* evolved from an early *Stephanorhinus* lineage and that this genus includes at least two  
67 distinct evolutionary lines. As such, the genus *Stephanorhinus* is currently paraphyletic and its  
68 systematic revision is therefore needed. We demonstrate that Early Pleistocene dental enamel  
69 proteome sequencing overcomes the limits of ancient collagen- and aDNA-based phylogenetic  
70 inference, and also provides additional information about the sex and taxonomic assignment of the  
71 specimens analysed. Dental enamel, the hardest tissue in vertebrates, is highly abundant in the fossil  
72 record. Our findings reveal that palaeoproteomic investigation of this material can push  
73 biomolecular investigation further back into the Early Pleistocene.

74

75

## 76 MAIN TEXT

77

78 Phylogenetic placement of extinct species increasingly relies on aDNA sequencing. Relentless  
79 efforts to improve the molecular tools underlying aDNA recovery have enabled the reconstruction  
80 of ~0.4 Ma and ~0.7 Ma old DNA sequences from temperate deposits<sup>9</sup> and subpolar regions<sup>10</sup>  
81 respectively. However, no aDNA data have so far been generated from species that became  
82 extinct beyond this time range. In contrast, ancient proteins represent a more durable source of  
83 genetic information, reported to survive, in eggshell, up to 3.8 Ma<sup>11</sup>. Ancient protein sequences  
84 can carry taxonomic and phylogenetic information useful to trace the evolutionary relationships  
85 between extant and extinct species<sup>12,13</sup>. However, so far, the recovery of ancient mammal proteins  
86 from sites too old or too warm to be compatible with aDNA preservation is mostly limited to  
87 collagen type I (COL1). Being highly conserved<sup>14</sup>, this protein is not an ideal marker. For example,  
88 regardless of endogeneity<sup>15</sup>, collagen-based phylogenetic placement of Dinosauria in relation to  
89 extant Aves appears to be unstable<sup>16</sup>. This suggests the exclusive use of COL1 in deep-time  
90 phylogenetics is constraining. Here, we aimed at overcoming these limitations by testing whether  
91 dental enamel, the hardest tissue in vertebrates<sup>17</sup>, can better preserve a richer set of ancient  
92 protein residues. This material, very abundant in the fossil record, would provide unprecedented  
93 access to biomolecular and phylogenetic data from Early Pleistocene animal remains.

94 Dated to ~1.77 Ma by a combination of Ar/Ar dating, paleomagnetism and biozonation<sup>18,19</sup>,  
95 the archaeological site of Dmanisi (Georgia, South Caucasus; Fig 1a) represents a context currently  
96 considered outside the scope of aDNA recovery. This site has been excavated since 1983, resulting  
97 in the discovery, along with stone tools and contemporaneous fauna, of almost one hundred  
98 hominin fossils, including five skulls representing the *georgicus* paleodeme within *Homo erectus*<sup>8</sup>.  
99 These are the earliest fossils of the first *Homo* species leaving Africa.

100 The geology of the Dmanisi deposits provides an ideal context for the preservation of  
101 faunal materials. The primary deposits at Dmanisi are aeolian, providing for rapid, gentle burial in  
102 fine-grained, calcareous sediments. We collected 23 bone, dentine, and dental enamel specimens  
103 of large mammals (Tab. 1) from multiple excavation units within stratum B1 (Fig. 1b, Fig. 2, Tab. 1).  
104 This is an ashfall deposit that contains thousands of faunal remains, as well as all hominin fossils,  
105 in different geomorphic contexts including pipes, shallow gullies and carnivore dens. All of these

106 are firmly dated between 1.85-1.76 Ma<sup>18</sup>. High-resolution tandem MS was used to confidently  
107 sequence ancient protein residues from the set of faunal remains, after digestion-free  
108 demineralisation in acid (see Methods). Ancient DNA analysis was unsuccessfully attempted on a  
109 subset of five bone and dentine specimens (see Methods).

110 While the recovery of proteins from bone and dentine specimens was sporadic and limited  
111 to collagen fragments, the analysis of dental enamel consistently returned sequences from most  
112 of its proteome, with occasional detection of multiple isoforms of the same protein<sup>20</sup> (Tab. 2, Fig.  
113 3). The small proteome<sup>21</sup> of mature dental enamel consists of structural enamel proteins, i.e.  
114 amelogenin (*AMELX*), enamelin (*ENAM*), amelotin (*AMTN*), and ameloblastin (*AMBN*), and enamel-  
115 specific proteases secreted during amelogenesis, i.e. matrix metalloproteinase-20 (*MMP20*) and  
116 kallikrein 4 (*KLK4*). The presence of non-specific proteins, such as serum albumin (*ALB*), has also  
117 been previously reported in mature dental enamel<sup>21,22</sup> (Tab. 2).

118 Multiple lines of evidence support the authenticity and the endogenous origin of the  
119 sequences recovered. There is full correspondence between the source material and the  
120 composition of the proteome recovered. Dental enamel proteins are extremely tissue-specific and  
121 confined to the dental enamel mineral matrix<sup>21</sup>. The amino acid composition of the intra-  
122 crystalline protein fraction, measured by chiral amino acid racemisation analysis, indicates that the  
123 dental enamel has behaved as a closed system, unaffected by amino acid and protein residues  
124 exchange with the burial environment (Fig. 4). The measured rate of asparagine and glutamine  
125 deamidation, a spontaneous form of hydrolytic damage consistently observed in ancient  
126 samples<sup>23</sup>, is particularly high, in some cases close to 100%, in full agreement with the age of the  
127 specimens investigated. (Fig. 2a). Other forms of non-enzymatic modifications are also present.  
128 Tyrosine (Y) experienced mono- and di-oxidation while tryptophan (W) was extensively converted  
129 into multiple oxidation products. (Fig. 5b). Oxidative degradation of histidine (H) and conversion of  
130 arginine (R) leading to ornithine accumulation were also observed. These modifications are  
131 absent, or much less frequent, in a medieval ovicaprine dental enamel control sample, further  
132 confirming the authenticity of the sequences reconstructed. Similarly, unlike in the control, the  
133 peptide length distribution in the Dmanisi dataset is dominated by short overlapping fragments,  
134 generated by advanced, diagenetically-induced, terminal hydrolysis (Fig. 5c and d).

135 Lastly, we confidently detect phosphorylation (Fig. 6 and Fig. 7), a tightly regulated  
136 physiological post-translational modification (PTM) occurring *in vivo*. Recently observed in ancient  
137 bone<sup>24</sup>, phosphorylation is known to be a stable PTM<sup>25</sup> present in dental enamel proteins<sup>26,27</sup>.  
138 Altogether, these observations demonstrate, beyond reasonable doubt, that the heavily  
139 diagenetically modified dental enamel proteome retrieved from the ~1.77 Ma old Dmanisi faunal  
140 material is endogenous and almost complete.

141 Next, we used the palaeoproteomic sequence information to improve taxonomic  
142 assignment and achieve sex attribution for some of the Dmanisi faunal remains. For example, the  
143 bone specimen 16857, described morphologically as an “undetermined herbivore”, could be  
144 assigned to the Bovidae family based on COL1 sequences (Fig. 8). In addition, confident  
145 identification of peptides specific for the isoform Y of amelogenin, coded on the non-recombinant  
146 portion of the Y chromosome, indicates that four tooth specimens, namely 16630, 16631, 16639,  
147 and 16856, belonged to male individuals<sup>22</sup> (Fig. 9a-d).

148 An enamel fragment, from the lower molar of a *Stephanorhinus* ex gr. *etruscus-*  
149 *hundsheimensis* (16635, Fig. 1c), returned the highest proteomic sequence coverage,  
150 encompassing a total of 875 amino acids, across 987 peptides (6 proteins). Following alignment of  
151 the enamel protein sequences retrieved from 16635 against their homologues from all the extant  
152 rhinoceros species, plus the extinct woolly rhinoceros (*†Coelodonta antiquitatis*) and Merck’s  
153 rhinoceros (*†Stephanorhinus kirchbergensis*), phylogenetic reconstructions place the Dmanisi  
154 specimen closer to the extinct woolly and Merck’s rhinoceroses than to the extant Sumatran  
155 rhinoceros (*Dicerorhinus sumatrensis*), as an early divergent sister lineage (Fig. 10).

156 Our phylogenetic reconstruction confidently recovers the expected differentiation of the  
157 *Rhinoceros* genus from other genera considered, in agreement with previous cladistic<sup>28</sup> and  
158 genetic analyses<sup>29</sup>. This topology defines two-horned rhinoceroses as monophyletic and the one-  
159 horned condition as plesiomorphic, as previously proposed<sup>30</sup>. We caution, however, that the  
160 higher-level relationships we observe between the rhinoceros monophyletic clades might be  
161 affected by demographic events, such as incomplete lineage sorting<sup>31</sup> and/or gene flow between  
162 groups<sup>32</sup>, due to the limited number of markers considered. A previous phylogenetic  
163 reconstruction, based on two collagen (*COL1α1* and *COL1α2*) partial amino acid sequences,  
164 supported a different topology, with the African clade representing an outgroup to Asian

165 rhinoceros species<sup>6</sup>. Most probably, a confident and stable reconstruction of the structure of the  
166 Rhinocerotidae family needs the strong support only high-resolution whole-genome sequencing  
167 can provide. Regardless, the highly supported placement of the Dmanisi rhinoceros in the  
168 (*Stephanorhinus*, Woolly, Sumatran) clade will likely remain unaffected, should deeper  
169 phylogenetic relationships between the *Rhinoceros* genus and other family members be revised.

170 The phylogenetic relationships of the genus *Stephanorhinus* within the family  
171 Rhinocerotidae, as well as those of the several species recognized within this genus, are  
172 contentious. *Stephanorhinus* was initially included in the extant South-East Asian genus  
173 *Dicerorhinus* represented by the Sumatran rhinoceros species (*D. sumatrensis*)<sup>33</sup>. This hypothesis  
174 has been rejected and, based on morphological data, *Stephanorhinus* has been identified as a  
175 sister taxon of the woolly rhinoceros<sup>34</sup>. Furthermore, ancient DNA analysis supports a sister  
176 relationship between the woolly rhinoceros and *D. sumatrensis*<sup>5,35,36</sup>.  
177 Recently, MS-based sequencing of collagen type I from a Middle Pleistocene European  
178 *Stephanorhinus* sp. specimen, ~320 ka (thousand years) old, was not able to resolve the  
179 relationships between *Stephanorhinus*, *Coelodonta* and *Dicerorhinus*<sup>6</sup>. Instead, the complete  
180 mitochondrial sequence of a terminal, 45-70 ka old, Siberian *S. kirchbergensis* specimen placed  
181 this species closer to *Coelodonta*, with *D. sumatrensis* as a sister branch<sup>7</sup>. Our results confirm the  
182 latter reconstruction. As the *Stephanorhinus* ex gr. *etruscus-hundsheimensis* sequences from  
183 Dmanisi branch off basal to the common ancestor of the woolly and Merck's rhinoceroses, these  
184 two species most likely derived from an early *Stephanorhinus* lineage expanding eastward from  
185 western Eurasia. Throughout the Plio-Pleistocene, *Coelodonta* adapted to continental and later  
186 cold-climate habitats in central Asia. Its earliest representative, *C. thibetana*, displayed some clear  
187 *Stephanorhinus*-like anatomical features<sup>34</sup>. The presence in eastern Europe and Anatolia of the  
188 genus *Stephanorhinus*<sup>35</sup> is documented at least since the late Miocene, and the Dmanisi specimen  
189 most likely represents an Early Pleistocene descendent of the Western-Eurasian branch of this  
190 genus.

191 Ultimately, our phylogenetic reconstructions show that, as currently defined, the genus  
192 *Stephanorhinus* is paraphyletic, in line with previous conclusions<sup>37</sup> based on morphological  
193 characters and the palaeobiogeographic fossil distribution. Accordingly, a systematic revision of  
194 the genera *Stephanorhinus* and *Coelodonta*, as well as their closest relatives, is needed.

195           In this study, we show that enamel proteome sequencing can overcome the time limits of  
196 ancient DNA preservation and the reduced phylogenetic content of COL1 sequences. Dental  
197 enamel proteomic sequences can be used to study evolutionary process that occurred in the Early  
198 Pleistocene. This posits dental enamel as the material of choice for deep-time palaeoproteomic  
199 analysis. Given the abundance of teeth in the palaeontological record, the approach presented  
200 here holds the potential to address a wide range of questions pertaining to the Early and Middle  
201 Pleistocene evolutionary history of a large number of mammals, including hominins, at least in  
202 temperate climates.  
203



## 204 **METHODS**

205

### 206 **Dmanisi & sample selection**

207 Dmanisi is located about 65 km southwest of the capital city of Tbilisi in the Kvemo Kartli region of  
208 Georgia, at an elevation of 910 m MSL (Lat: 41° 20' N, Lon: 44° 20' E)<sup>8,19</sup>. The 23 fossil specimens  
209 we analysed were retrieved from stratum B1, in excavation blocks M17, M6, block 2, and area R11  
210 (Tab. 1 and Fig. 2). Stratum B deposits date between 1.78 Ma and 1.76 Ma<sup>18</sup>. All the analysed  
211 specimens were collected between 1984 and 2014 and their taxonomic identification was based  
212 on traditional comparative anatomy.

213 After the sample preparation and data acquisition for all the Dmanisi specimens was  
214 concluded, we applied the whole experimental procedure to a medieval ovicaprine (sheep/goat)  
215 dental enamel specimen that was used as control. For this sample, we used extraction protocol  
216 “C”, and generated tandem MS data using a Q Exactive HF mass spectrometer (Thermo Fisher  
217 Scientific). The data were searched against the goat proteome, downloaded from the NCBI  
218 Reference Sequence Database (RefSeq) archive<sup>38</sup> on 31<sup>st</sup> May 2017. The ovicaprine specimen was  
219 found at the “Hotel Skandinavia” site in the city of Århus, Denmark and was stored at the Natural  
220 History Museum of Denmark.

221

### 222 **Biomolecular preservation**

223 We assessed the potential of ancient protein preservation prior to proteomic analysis by  
224 measuring the extent of amino acid racemisation in a subset of samples (6/23)<sup>39</sup>. Enamel chips  
225 were powdered, and two subsamples per specimen were subject to analysis of their free (FAA)  
226 and total hydrolysable (THAA) amino acid fractions. Samples were analysed in duplicate by RP-  
227 HPLC, with standards and blanks run alongside each one of them. The D/L values of aspartic  
228 acid/asparagine, glutamic acid/glutamine, phenylalanine and alanine (D/L Asx, Glx, Phe, Ala) were  
229 assessed (Fig. 4) to provide an overall estimate of intra-crystalline protein decomposition (IcPD).

230

## 231 **PROTEOMICS**

232 All the sample preparation procedures for palaeoproteomic analysis were conducted in  
233 laboratories dedicated to the analysis of ancient DNA and ancient proteins in clean rooms fitted

234 with filtered ventilation and positive pressure, in line with recent recommendations for ancient  
235 protein analysis<sup>40</sup>. A mock “extraction blank”, containing no starting material, was prepared,  
236 processed and analysed together with each batch of ancient samples.

237

### 238 **Sample preparation**

239 The external surface of bone and dentine samples was gently removed, and the remaining  
240 material was subsequently powdered. Enamel fragments, occasionally mixed with small amounts  
241 of dentine, were removed from teeth with a cutting disc and subsequently crushed into a rough  
242 powder. Ancient protein residues were extracted from approximately 180-220 mg of mineralised  
243 material, unless otherwise specified, using three different extraction protocols, hereafter referred  
244 to as “A”, “B” and “C”:

245

246 **EXTRACTION PROTOCOL A - FASP.** Tryptic peptides were generated using a filter-aided sample  
247 preparation (FASP) approach<sup>41</sup>, as previously performed on ancient samples<sup>42</sup>.

248

249 **EXTRACTION PROTOCOL B - GuHCl SOLUTION AND DIGESTION.** Bone or dentine powder was demineralised  
250 in 1 mL 0.5 M EDTA pH 8.0. After removal of the supernatant, all demineralised pellets were re-  
251 suspended in a 300 µL solution containing 2 M guanidine hydrochloride (GuHCl, Thermo  
252 Scientific), 100 mM Tris pH 8.0, 20 mM 2-Chloroacetamide (CAA), 10 mM Tris (2-  
253 carboxyethyl)phosphine (TCEP) in ultrapure H<sub>2</sub>O<sup>43,44</sup>. A total of 0.2 µg of mass spectrometry-grade  
254 rLysC (Promega P/N V1671) enzyme was added before the samples were incubated for 3-4 hours  
255 at 37°C with agitation. Samples and negative controls were subsequently diluted to 0.6 M GuHCl,  
256 and 0.8 µg of mass spectrometry-grade Trypsin (Promega P/N V5111) was added. The entire  
257 amount of extracted proteins was digested. Next, samples and negative controls were incubated  
258 overnight under mechanical agitation at 37°C. On the following day, samples were acidified, and  
259 the tryptic peptides were immobilised on Stage-Tips, as previously described<sup>45</sup>.

260

261 **EXTRACTION PROTOCOL C - DIGESTION-FREE ACID DEMINERALISATION.** Dental enamel powder was  
262 demineralised in 1.2 M HCl at room temperature, after which the solubilised protein residues were  
263 directly cleaned and concentrated on Stage-Tips, as described above. The sample prepared on

264 Stage-Tip “#1217” was processed with 10% TFA instead of 1.2 M HCl. All the other parameters and  
265 procedures were identical to those used for all the other samples extracted with protocol “C”.

266

### 267 **Tandem mass spectrometry**

268 Different sets of samples were analysed by nanoflow liquid chromatography coupled to tandem  
269 mass spectrometry (nanoLC-MS/MS) on an EASY-nLC™ 1000 or 1200 system connected to a Q-  
270 Exactive, a Q-Exactive Plus, or to a Q-Exactive HF (Thermo Scientific, Bremen, Germany) mass  
271 spectrometer. Before and after each MS/MS run measuring ancient or extraction blank samples,  
272 two successive MS/MS run were included in the sample queue in order to prevent carryover  
273 contamination between the samples. These consisted, first, of a MS/MS run (“MS/MS blank” run)  
274 with an injection exclusively of the buffer used to re-suspend the samples (0.1% TFA, 5% ACN),  
275 followed by a second MS/MS run (“MS/MS wash” run) with no injection.

276

### 277 **Data analysis**

278 Raw data files generated during MS/MS spectral acquisition were searched using MaxQuant<sup>46</sup>,  
279 version 1.5.3.30, and PEAKS<sup>47</sup>, version 7.5. A two-stage peptide-spectrum matching approach was  
280 adopted. Raw files were initially searched against a target/reverse database of collagen and  
281 enamel proteins retrieved from the UniProt and NCBI Reference Sequence Database (RefSeq)  
282 archives<sup>38,48</sup>, taxonomically restricted to mammalian species. A database of partial “COL1A1” and  
283 “COL1A2” sequences from cervid species<sup>13</sup> was also included. The results from the preliminary  
284 analysis were used for a first, provisional reconstruction of protein sequences.

285 For specimens whose dataset resulted in a narrower, though not fully resolved, initial  
286 taxonomic placement, a second MaxQuant search (MQ2) was performed using a new protein  
287 database taxonomically restricted to the “order” taxonomic rank as determined after MQ1. For  
288 the MQ2 matching of the MS/MS spectra from specimen 16635, partial sequences of serum  
289 albumin and enamel proteins from Sumatran (*Dicerorhinus sumatrensis*), Javan (*Rhinoceros*  
290 *sondaicus*), Indian (*Rhinoceros unicornis*), woolly (*Coelodonta antiquitatis*), Mercks  
291 (*Stephanorhinus kirchbergensis*), and Black rhinoceros (*Diceros bicornis*), were also added to the  
292 protein database. All the protein sequences from these species were reconstructed from draft  
293 genomes for each species (Dalen and Gilbert, unpublished data).

294 For each MaxQuant and PEAKS search, enzymatic digestion was set to “unspecific” and the  
295 following variable modifications were included: oxidation (M), deamidation (NQ), N-term Pyro-Glu  
296 (Q), N-term Pyro-Glu (E), hydroxylation (P), phosphorylation (S). The error tolerance was set to 5  
297 ppm for the precursor and to 20 ppm, or 0.05 Da, for the fragment ions in MaxQuant and PEAKS  
298 respectively. For searches of data generated from sample fractions partially or exclusively digested  
299 with trypsin, another MaxQuant and PEAKS search was conducted using the “enzyme” parameter  
300 set to “Trypsin/P”. Carbamidomethylation (C) was set: (i) as a fixed modification, for searches of  
301 data generated from sets of sample fractions exclusively digested with trypsin, or (ii) as a variable  
302 modification, for searches of data generated from sets of sample fractions partially digested with  
303 trypsin. For searches of data generated exclusively from undigested sample fractions,  
304 carbamidomethylation (C) was not included as a modification, neither fixed nor variable.

305 The datasets re-analysed with MQ2 search, were also processed with the PEAKS software  
306 using the entire workflow (PEAKS *de novo* to PEAKS SPIDER) in order to detect hitherto unreported  
307 single amino acid polymorphisms (SAPs). Any amino acid substitution detected by the “SPIDER”  
308 homology search algorithm was validated by repeating the MaxQuant search (MQ3). In MQ3, the  
309 protein database used for MQ2 was modified to include the amino acid substitutions detected by  
310 the “SPIDER” algorithm.

311

### 312 **Ancient protein sequence reconstruction**

313 The peptide sequences confidently identified by the MQ1, MQ2, MQ3 were aligned using the  
314 software Geneious<sup>49</sup> (v. 5.4.4, substitution matrix BLOSUM62, gap open penalty 12 and gap  
315 extension penalty). The peptide sequences confidently identified by the PEAKS searches were  
316 aligned using an in-house R-script. A consensus sequence for each protein from each specimen  
317 was generated in FASTA format, without filtering on depth of coverage. Amino acid positions that  
318 were not confidently reconstructed were replaced by an “X”. We took into account variable  
319 leucine/isoleucine, glutamine/glutamic acid, and asparagine/aspartic acid positions through  
320 manual interpretation of possible conflicting positions (leucine/isoleucine) and replacement of  
321 possibly deamidated positions into “X” for phylogenetically informative sites. The output of the  
322 MQ2 and 3 peptide-spectrum matching was used to extend the coverage of the ancient protein  
323 sequences initially identified in the MQ1 iteration.

324

## 325 **Post translational modifications**

326 **DEAMIDATION.** After removal of likely contaminants, the extent of glutamine and asparagine  
327 deamidation was estimated for individual specimens, by using the MaxQuant output files as  
328 previously published<sup>44</sup>.

329 **OTHER SPONTANEOUS CHEMICAL MODIFICATIONS.** Spontaneous post-translational modifications (PTMs)  
330 associated with chemical protein damage were searched using the PEAKS PTM tool and the  
331 dependent peptides search mode<sup>50</sup> in MaxQuant. In the PEAKS PTM search, all modifications in  
332 the Unimod database were considered. The mass error was set to 5.0 ppm and 0.5 Da for  
333 precursor and fragment, respectively. For PEAKS, the *de novo* ALC score was set to a threshold of  
334 15 % and the peptide hit threshold to 30. The results were filtered by an FDR of 5 %, *de novo* ALC  
335 score of 50 %, and a protein hit threshold of  $\geq 20$ . The MaxQuant dependent peptides search was  
336 carried out with the same search settings as described above and with a dependent peptide FDR  
337 of 1 % and a mass bin size of 0.0065 Da. For validation purposes, up to 10 discovered modifications  
338 were specified as variable modifications and re-searched with MaxQuant. The peptide FDR was  
339 manually adjusted to 5 % on PSM level and the PTMs were semi-quantified by relative spectral  
340 counting.

341 **PHOSPHORYLATION.** Class I phosphorylation sites were selected with localisation probabilities of  
342  $\geq 0.98$  in the Phosph(ST)Sites MaxQuant output file. Sequence windows of  $\pm 6$  aa from all identified  
343 sites were compared against a background file containing all non-phosphorylated peptides using a  
344 linear kinase sequence motif enrichment analysis in IceLogo<sup>51</sup>.

345

## 346 **PHYLOGENETIC ANALYSIS**

### 347 **Reference datasets**

348 We assembled a reference dataset consisting of publicly available protein sequences from  
349 representative ungulate species belonging to the following families: Equidae, Rhinocerotidae,  
350 Suidae and Bovidae. We extended this dataset with the protein sequences from extinct and extant  
351 rhinoceros species including: the woolly rhinoceros (*†Coelodonta antiquitatis*), the Merck's  
352 rhinoceros (*†Stephanorhinus kirchbergensis*), the Sumatran rhinoceros (*Dicerorhinus sumatrensis*),  
353 the Javan rhinoceros (*Rhinoceros sondaicus*), the Indian rhinoceros (*Rhinoceros unicornis*), and the

354 Black rhinoceros (*Diceros bicornis*). Their corresponding protein sequences were obtained  
355 following translation of high-throughput DNA sequencing data, after filtering reads with mapping  
356 quality lower than 30 and nucleotides with base quality lower than 20, and calling the majority  
357 rule consensus sequence using ANGSD<sup>52</sup>. For the woolly and Merck's rhinoceroses we excluded the  
358 first and last five nucleotides of each DNA fragment in order to minimize the effect of post-  
359 mortem ancient DNA damage<sup>53</sup>. Each consensus sequence was formatted as a separate blast  
360 nucleotide database. We then performed a tblastn<sup>54</sup> alignment using the corresponding white  
361 rhinoceros sequence as a query, favouring ungapped alignments in order to recover translated  
362 and spliced protein sequences. Resulting alignments were processed using ProSplign algorithm  
363 from the NCBI Eukaryotic Genome Annotation Pipeline<sup>55</sup> to recover the spliced alignments and  
364 translated protein sequences.

365

### 366 **Construction of phylogenetic trees**

367 For each specimen, multiple sequence alignments for each protein were built using mafft<sup>56</sup> and  
368 concatenated onto a single alignment per specimen. These were inspected visually to correct  
369 obvious alignment mistakes, and all the isoleucine residues were substituted with leucine ones to  
370 account for indistinguishable isobaric amino acids at the positions where the ancient protein  
371 carried one of such amino acids. Based on these alignments, we inferred the phylogenetic  
372 relationship between the ancient samples and the species included in the reference dataset by  
373 using three approaches: distance-based neighbour-joining, maximum likelihood and Bayesian  
374 phylogenetic inference.

375 Neighbour-joining trees were built using the phangorn<sup>57</sup> R package, restricting to sites  
376 covered in the ancient samples. Genetic distances were estimated using the JTT model,  
377 considering pairwise deletions. We estimated bipartition support through a non-parametric  
378 bootstrap procedure using 500 pseudoreplicates. We used PHyML 3.1<sup>58</sup> for maximum likelihood  
379 inference based on the whole concatenated alignment. For likelihood computation, we used the  
380 JTT substitution model with two additional parameters for modelling rate heterogeneity and the  
381 proportion of invariant sites. Bipartition support was estimated using a non-parametric bootstrap  
382 procedure with 500 replicates. Bayesian phylogenetic inference was carried out using MrBayes  
383 3.2.6<sup>59</sup> on each concatenated alignment, partitioned per gene. While we chose the JTT

384 substitution model in the two approaches above, we allowed the Markov chain to sample  
385 parameters for the substitution rates from a set of predetermined matrices, as well as the shape  
386 parameter of a gamma distribution for modelling across-site rate variation and the proportion of  
387 invariable sites. The MCMC algorithm was run with 4 chains for 5,000,000 cycles. Sampling was  
388 conducted every 500 cycles and the first 25% were discarded as burn-in. Convergence was  
389 assessed using Tracer v. 1.6.0, which estimated an ESS greater than 5,500 for each individual,  
390 indicating reasonable convergence for all runs.

391

## 392 **ANCIENT DNA ANALYSIS**

393 The samples were processed using strict aDNA guidelines in a clean lab facility at the Centre for  
394 GeoGenetics, Natural History Museum of Denmark, University of Copenhagen. DNA extraction was  
395 attempted on five of the ancient animal samples. Powdered samples (120-140 mg) were extracted  
396 using a silica-in-solution method<sup>10,60</sup>. To prepare the samples for NGS sequencing, 20  $\mu$ L of DNA  
397 extract was built into a blunt-end library using the NEBNext DNA Sample Prep Master Mix Set 2  
398 (E6070) with Illumina-specific adapters. The libraries were PCR-amplified with inPE1.0 forward  
399 primers and custom-designed reverse primers with a 6-nucleotide index<sup>61</sup>. Two extracts (MA399  
400 and MA2481, from specimens 16859 and 16635 respectively) yielded detectable DNA  
401 concentrations. These extracts were used to construct three individual index-barcoded libraries  
402 (MA399\_L1, MA399\_L2, MA2481\_L1) whose amplification required a total of 30 PCR cycles in a 2-  
403 round setup (12 cycles with total library + 18 cycles with a 5  $\mu$ L library aliquot from the first  
404 amplification). The libraries generated from specimen 16859 and 16635 were processed on  
405 different flow cells. They were pooled with others for sequencing on an Illumina 2000 platform  
406 (MA399\_L1, MA399\_L2) using 100bp single read chemistry and on an Illumina 2500 platform  
407 (MA2481\_L1) using 81bp single read chemistry.

408 The data were base-called using the Illumina software CASAVA 1.8.2 and sequences were  
409 demultiplexed with a requirement of a full match of the six nucleotide indexes that were used.  
410 Raw reads were processed using the PALEOMIX pipeline following published guidelines<sup>62</sup>, mapping  
411 against the cow nuclear genome (*Bos taurus* 4.6.1, accession GCA\_000003205.4), the cow  
412 mitochondrial genome (*Bos taurus*), the red deer mitochondrial genome (*Cervus elaphus*,  
413 accession AB245427.2), and the human nuclear genome (GRCh37/hg19), using BWA backtrack<sup>63</sup>

414 v0.5.10 with the seed disabled. All other parameters were set as default. PCR duplicates from  
415 mapped reads were removed using the picard tool *MarkDuplicate*  
416 [<http://picard.sourceforge.net/>].

417

## 418 **SAMPLE 16635 MORPHOLOGICAL MEASUREMENTS**

419 We followed the methodology introduced by Guérin<sup>33</sup>. The maximal length of the tooth is  
420 measured with a digital calliper at the lingual side of the tooth and parallel to the occlusal surface.  
421 All measurements are given in mm.

422

## 423 **DATA DEPOSITION**

424 All the mass spectrometry proteomics data have been deposited in the ProteomeXchange  
425 Consortium (<http://proteomecentral.proteomexchange.org>) via the PRIDE partner repository with  
426 the data set identifier PXD011008.

427

428

## 429 **References**

430

- 431 1 Cappellini, E. *et al.* Ancient Biomolecules and Evolutionary Inference. *Annual Review of*  
432 *Biochemistry* **87**, 1029-1060, doi:10.1146/annurev-biochem-062917-012002 (2018).
- 433 2 Dabney, J., Meyer, M. & Pääbo, S. Ancient DNA damage. *Cold Spring Harbor Perspectives in*  
434 *Biology* **5**, a012567, doi:10.1101/cshperspect.a012567 (2013).
- 435 3 Meyer, M. *et al.* Nuclear DNA sequences from the Middle Pleistocene Sima de los Huesos  
436 hominins. *Nature* **531**, 504-507, doi:10.1038/nature17405 (2016).
- 437 4 Wadsworth, C. & Buckley, M. Proteome degradation in fossils: investigating the longevity  
438 of protein survival in ancient bone. *Rapid Communications in Mass Spectrometry* **28**, 605-  
439 615, doi:10.1002/rcm.6821 (2014).
- 440 5 Willerslev, E. *et al.* Analysis of complete mitochondrial genomes from extinct and extant  
441 rhinoceroses reveals lack of phylogenetic resolution. *BMC Evolutionary Biology* **9**, 95,  
442 doi:10.1186/1471-2148-9-95 (2009).
- 443 6 Welker, F. *et al.* Middle Pleistocene protein sequences from the rhinoceros genus and the  
444 phylogeny of extant and extinct Middle/Late Pleistocene Rhinocerotidae. *PeerJ* **5**, e3033,  
445 doi:10.7717/peerj.3033 (2017).
- 446 7 Kirillova, I. *et al.* Discovery of the skull of *Stephanorhinus kirchbergensis* (Jäger, 1839)  
447 above the Arctic Circle. *Quaternary Research* **88**, 537-550, doi:10.1017/qua.2017.53 (2017).
- 448 8 Lordkipanidze, D. *et al.* A complete skull from Dmanisi, Georgia, and the evolutionary  
449 biology of early Homo. *Science* **342**, 326-331, doi:10.1126/science.1238484 (2013).
- 450 9 Valdiosera, C. *et al.* Typing single polymorphic nucleotides in mitochondrial DNA as a way  
451 to access Middle Pleistocene DNA. *Biology Letters* **2**, 601-603, doi:10.1098/rsbl.2006.0515  
452 (2006).



- 453 10 Orlando, L. *et al.* Recalibrating Equus evolution using the genome sequence of an early  
454 Middle Pleistocene horse. *Nature* **499**, 74-78, doi:10.1038/nature12323 (2013).
- 455 11 Demarchi, B. *et al.* Protein sequences bound to mineral surfaces persist into deep time.  
456 *eLife* **5**, e17092, doi:10.7554/eLife.17092 (2016).
- 457 12 Welker, F. *et al.* Ancient proteins resolve the evolutionary history of Darwin's South  
458 American ungulates. *Nature* **522**, 81-84, doi:10.1038/nature14249 (2015).
- 459 13 Welker, F. *et al.* Palaeoproteomic evidence identifies archaic hominins associated with the  
460 Châtelperronian at the Grotte du Renne. *Proceedings of the National Academy of Sciences*  
461 **113**, 11162-11167, doi:10.1073/pnas.1605834113 (2016).
- 462 14 Nei, M. *Molecular evolutionary genetics*. Vol. 75 (Columbia University Press, 1987).
- 463 15 Buckley, M., Warwood, S., van Dongen, B., Kitchener, A. C. & Manning, P. L. A fossil protein  
464 chimera; difficulties in discriminating dinosaur peptide sequences from modern cross-  
465 contamination. *Proceedings of the Royal Society: Biological sciences* **284**, 20170544,  
466 doi:10.1098/rspb.2017.0544 (2017).
- 467 16 Schroeter, E. R. *et al.* Expansion for the Brachylophosaurus canadensis Collagen I Sequence  
468 and Additional Evidence of the Preservation of Cretaceous Protein. *Journal of Proteome*  
469 *Research* **16**, 920-932, doi:10.1021/acs.jproteome.6b00873 (2017).
- 470 17 Eastoe, J. E. Organic Matrix of Tooth Enamel. *Nature* **187**, 411-412, doi:10.1038/187411b0  
471 (1960).
- 472 18 Ferring, R. *et al.* Earliest human occupations at Dmanisi (Georgian Caucasus) dated to 1.85-  
473 1.78 Ma. *Proceedings of the National Academy of Sciences of the United States of America*  
474 **108**, 10432-10436, doi:10.1073/pnas.1106638108 (2011).
- 475 19 Gabunia, L. *et al.* Earliest Pleistocene hominid cranial remains from Dmanisi, Republic of  
476 Georgia: taxonomy, geological setting, and age. *Science* **288**, 1019-1025,  
477 doi:10.1126/science.288.5468.1019 (2000).
- 478 20 Gibson, C. W. *et al.* Identification of the leucine-rich amelogenin peptide (LRAP) as the  
479 translation product of an alternatively spliced transcript. *Biochemical and biophysical*  
480 *research communications* **174**, 1306, doi:10.1016/0006-291X(91)91564-S (1991).
- 481 21 Castiblanco, G. A. *et al.* Identification of proteins from human permanent erupted enamel.  
482 *European Journal of Oral Sciences* **123**, 390-395, doi:10.1111/eos.12214 (2015).
- 483 22 Stewart, N. A. *et al.* The identification of peptides by nanoLC-MS/MS from human surface  
484 tooth enamel following a simple acid etch extraction. *RSC Advances* **6**, 61673-61679,  
485 doi:10.1039/c6ra05120k (2016).
- 486 23 van Doorn, N. L., Wilson, J., Hollund, H., Soressi, M. & Collins, M. J. Site-specific  
487 deamidation of glutamine: a new marker of bone collagen deterioration. *Rapid*  
488 *Communications in Mass Spectrometry* **26**, 2319-2327, doi:10.1002/rcm.6351 (2012).
- 489 24 Cleland, T. P. Solid Digestion of Demineralized Bone as a Method to Access Potentially  
490 Insoluble Proteins and Post-Translational Modifications. *Journal of Proteome Research* **17**,  
491 536-542, doi:10.1021/acs.jproteome.7b00670 (2018).
- 492 25 Hunter, T. Why nature chose phosphate to modify proteins. *Philosophical Transactions of*  
493 *the Royal Society B* **367**, 2513-2516, doi:10.1098/rstb.2012.0013 (2012).
- 494 26 Tagliabracci, V. S. *et al.* Secreted kinase phosphorylates extracellular proteins that regulate  
495 biomineralization. *Science* **336**, 1150-1153, doi:10.1126/science.1217817 (2012).

- 496 27 Lasa-Benito, M., Marin, O., Meggio, F. & Pinna, L. A. Golgi apparatus mammary gland  
497 casein kinase: monitoring by a specific peptide substrate and definition of specificity  
498 determinants. *FEBS Letters* **382**, 149-152, doi:10.1016/0014-5793(96)00136-6 (1996).
- 499 28 Antoine, P. O. *et al.* A revision of *Aceratherium blanfordi* Lydekker, 1884 (Mammalia:  
500 Rhinocerotidae) from the Early Miocene of Pakistan: postcranials as a key. *Zoological*  
501 *Journal of the Linnean Society* **160**, 139-194, doi:10.1111/j.1096-3642.2009.00597.x (2010).
- 502 29 Steiner, C. C. & Ryder, O. A. Molecular phylogeny and evolution of the Perissodactyla.  
503 *Zoological Journal of the Linnean Society* **163**, 1289-1303, doi:10.1111/j.1096-  
504 3642.2011.00752.x (2011).
- 505 30 Loose, H. Pleistocene Rhinocerotidae of W. Europe with reference to the recent two-  
506 horned species of Africa and S. E. Asia. *Scripta Geologica* **33**, 1-59 (1975).
- 507 31 Hobolth, A., Dutheil, J. Y., Hawks, J., Schierup, M. H. & Mailund, T. Incomplete lineage  
508 sorting patterns among human, chimpanzee, and orangutan suggest recent orangutan  
509 speciation and widespread selection. *Genome research* **21**, 349-356,  
510 doi:10.1101/gr.114751.110 (2011).
- 511 32 Rieseberg, L. H. Evolution: replacing genes and traits through hybridization. *Current Biology*  
512 **19**, R119-R122, doi:10.1016/j.cub.2008.12.016 (2009).
- 513 33 Guérin, C. Les rhinocéros (Mammalia, Perissodactyla) du Miocène terminal au Pleistocène  
514 supérieur en Europe occidentale, comparaison avec les espèces actuelles. *Documents du*  
515 *Laboratoire de Géologie de la Faculté des Sciences de Lyon* **79**, 3-1183 (1980).
- 516 34 Deng, T. *et al.* Out of Tibet: pliocene woolly rhino suggests high-plateau origin of Ice Age  
517 megaherbivores. *Science* **333**, 1285-1288, doi:10.1126/science.1206594 (2011).
- 518 35 Orlando, L. *et al.* Ancient DNA analysis reveals woolly rhino evolutionary relationships.  
519 *Molecular Phylogenetics and Evolution* **28**, 485-499, doi:10.1016/S1055-7903(03)00023-X  
520 (2003).
- 521 36 Yuan, J. *et al.* Ancient DNA sequences from *Coelodonta antiquitatis* in China reveal its  
522 divergence and phylogeny. *Science China Earth Sciences* **57**, 388-396, doi:10.1007/s11430-  
523 013-4702-6 (2014).
- 524 37 Heissig, K. in *The Miocene Land Mammals of Europe* (eds G.E. Rössner & K Heissig) 175-188  
525 (Friedrich Pfeil, 1999).
- 526 38 O'Leary, N. A. *et al.* Reference sequence (RefSeq) database at NCBI: current status,  
527 taxonomic expansion, and functional annotation. *Nucleic acids research* **44**, D733-D745,  
528 doi:10.1093/nar/gkv1189 (2016).
- 529 39 Penkman, K. E. H., Kaufman, D. S., Maddy, D. & Collins, M. J. Closed-system behaviour of  
530 the intra-crystalline fraction of amino acids in mollusc shells. *Quaternary Geochronology* **3**,  
531 2-25, doi:10.1016/j.quageo.2007.07.001 (2008).
- 532 40 Hendy, J. *et al.* A guide to ancient protein studies. *Nature Ecology & Evolution* **2**, 791-799,  
533 doi:10.1038/s41559-018-0510-x (2018).
- 534 41 Wiśniewski, J. R., Zougman, A., Nagaraj, N. & Mann, M. Universal sample preparation  
535 method for proteome analysis. *Nature Methods* **6**, 359-362, doi:10.1038/nmeth.1322  
536 (2009).
- 537 42 Cappellini, E. *et al.* Resolution of the type material of the Asian elephant, *Elephas maximus*  
538 Linnaeus, 1758 (Proboscidea, Elephantidae). *Zoological Journal of the Linnean Society* **170**,  
539 222-232, doi:10.1111/zoj.12084 (2014).

- 540 43 Kulak, N. A., Pichler, G., Paron, I., Nagaraj, N. & Mann, M. Minimal, encapsulated  
541 proteomic-sample processing applied to copy-number estimation in eukaryotic cells.  
542 *Nature Methods* **11**, 319-324, doi:10.1038/nmeth.2834 (2014).
- 543 44 Mackie, M. *et al.* Palaeoproteomic Profiling of Conservation Layers on a 14th Century  
544 Italian Wall Painting. *Angewandte Chemie (International ed.)* **57**, 7369-7374,  
545 doi:10.1002/anie.201713020 (2018).
- 546 45 Cappellini, E. *et al.* Proteomic analysis of a pleistocene mammoth femur reveals more than  
547 one hundred ancient bone proteins. *Journal of Proteome Research* **11**, 917-926,  
548 doi:10.1021/pr200721u (2012).
- 549 46 Cox, J. & Mann, M. MaxQuant enables high peptide identification rates, individualized  
550 p.p.b.-range mass accuracies and proteome-wide protein quantification. *Nature*  
551 *Biotechnology* **26**, 1367-1372, doi:10.1038/nbt.1511 (2008).
- 552 47 Zhang, J. *et al.* PEAKS DB: De novo sequencing assisted database search for sensitive and  
553 accurate peptide identification. *Molecular and Cellular Proteomics* **11**, M111.010587,  
554 doi:10.1074/mcp.M111.010587 (2012).
- 555 48 The UniProt Consortium. UniProt: the universal protein knowledgebase. *Nucleic Acids*  
556 *Research* **45**, D158-D169, doi:10.1093/nar/gkw1099 (2017).
- 557 49 Kearse, M. *et al.* Geneious Basic: An integrated and extendable desktop software platform  
558 for the organization and analysis of sequence data. *Bioinformatics* **28**, 1647-1649,  
559 doi:10.1093/bioinformatics/bts199 (2012).
- 560 50 Tyanova, S., Temu, T. & Cox, J. The MaxQuant computational platform for mass  
561 spectrometry-based shotgun proteomics. *Nature Protocols* **11**, 2301-2319,  
562 doi:10.1038/nprot.2016.136 (2016).
- 563 51 Colaert, N., Helsens, K., Martens, L., Vandekerckhove, J. & Gevaert, K. Improved  
564 visualization of protein consensus sequences by iceLogo. *Nature Methods* **6**, 786-787,  
565 doi:10.1038/nmeth1109-786 (2009).
- 566 52 Korneliussen, T., Albrechtsen, A. & Nielsen, R. ANGSD: Analysis of Next Generation  
567 Sequencing Data. *BMC Bioinformatics* **15**, 356-356, doi:10.1186/s12859-014-0356-4 (2014).
- 568 53 Briggs, A. *et al.* Removal of deaminated cytosines and detection of in vivo methylation in  
569 ancient DNA. *Nucleic Acids Research* **38**, e87, doi:10.1093/nar/gkp1163 (2010).
- 570 54 Altschul, S. F. *et al.* Gapped BLAST and PSI-BLAST: a new generation of protein database  
571 search programs. *Nucleic Acids Research* **25**, 3389-3402 (1997).
- 572 55 Sea Urchin Genome Sequencing Consortium. The Genome of the Sea Urchin  
573 *Strongylocentrotus purpuratus*. *Science* **314**, 941-952 (2006).
- 574 56 Katoh, K. & Frith, M. C. Adding unaligned sequences into an existing alignment using  
575 MAFFT and LAST. *Bioinformatics* **28**, 3144-3146, doi:10.1093/bioinformatics/bts578 (2012).
- 576 57 Schliep, K. P. phangorn: phylogenetic analysis in R. *Bioinformatics* **27**, 592-593,  
577 doi:10.1093/bioinformatics/btq706 (2011).
- 578 58 Guindon, S. *et al.* New Algorithms and Methods to Estimate Maximum-Likelihood  
579 Phylogenies: Assessing the Performance of PhyML 3.0. *Systematic Biology* **59**, 307-321,  
580 doi:10.1093/sysbio/syq010 (2010).
- 581 59 Ronquist, F. *et al.* MrBayes 3.2: Efficient Bayesian Phylogenetic Inference and Model Choice  
582 Across a Large Model Space. *Systematic Biology* **61**, 539-542, doi:10.1093/sysbio/sys029  
583 (2012).

- 584 60 Rohland, N. & Hofreiter, M. Comparison and optimization of ancient DNA extraction.  
585 *BioTechniques* **42**, 343-352, doi:10.2144/000112383 (2007).
- 586 61 Meyer, M. & Kircher, M. Illumina sequencing library preparation for highly multiplexed  
587 target capture and sequencing. *Cold Spring Harbor Protocols*, doi:10.1101/pdb.prot5448  
588 (2010).
- 589 62 Schubert, M. *et al.* Characterization of ancient and modern genomes by SNP detection and  
590 phylogenomic and metagenomic analysis using PALEOMIX. *Nature Protocols* **9**, 1056-1082,  
591 doi:10.1038/nprot.2014.063 (2014).
- 592 63 Li, H. & Durbin, R. Fast and accurate short read alignment with Burrows– Wheeler  
593 transform. *Bioinformatics* **25**, 1754-1760, doi:10.1093/bioinformatics/btp324 (2009).
- 594

595

## 596 **ACKNOWLEDGEMENTS**

597

598 We would like to thank, Kristian Murphy Gregersen, for providing the medieval control specimen,  
599 Marcus Anders Krag for the photographs used in Fig. 1c, Fedor Shidlovskiy for providing access to  
600 the Merck’s rhino sample, Beatrice Triozzi for technical help, Ashot Margaryan and Shyam  
601 Gopalakrishnan for their precious comments during data interpretation. EC and FW are supported  
602 by VILLUM Fonden (grant number 17649). EC, CK, JVO, PR and DS are supported by the Marie  
603 Skłodowska Curie European Training Network “TEMPERA” (grant number 722606). MM is  
604 supported by the University of Copenhagen KU2016 (UCPH Excellence Programme) grant and by  
605 the Danish National Research Foundation award PROTEIOS (DNRF128). Work at the Novo Nordisk  
606 Foundation Center for Protein Research is funded in part by a generous donation from the Novo  
607 Nordisk Foundation (Grant number NNF14CC0001). MTPG is supported by ERC Consolidator Grant  
608 “EXTINCTION GENOMICS” (grant number 681396). LP was supported by the EU-SYNTHESYS project  
609 (AT-TAF-2550, DE-TAF-3049, GB-TAF-2825, HU-TAF-3593, ES-TAF-2997) funded by the European  
610 Commission. LO is supported by the ERC Consolidator Grant “PEGASUS” (grant agreement No  
611 681605). BM-N is supported by the Spanish Ministry of Sciences (grant number CGL2016-80975-P).  
612 BS, JK and PH are supported by the Gordon and Betty Moore foundation. The aDNA analysis was  
613 carried out using the HPC facilities of the University of Luxembourg.

614

615

## 616 **AUTHOR CONTRIBUTIONS**

617

618 E.C., D.Lo., and E.W. designed the study. A.K.F., M.M., R.R.J.-C., M.E.A., M.D., K.P., and E.C.  
619 performed laboratory experiments. M.Bu., M.T., R.F., E.P., T.S., Y.L.C., A.Gö., S.N., P.H., J.K., I.K.,  
620 Y.M., J.A., R.-D.K., G.K., B.M.-N., M.-H.S.S., S.L., M.S.V., B.S., L.D., M.T.P.G., and D.Lo., provided  
621 ancient samples or modern reference material. E.C., F.W., L.P., J.R.M., D.Ly, V.J.M.M., A.K., D.S.,  
622 C.K., A.Gi., L.O., L.R., J.V.O., P.R., M.D., and K.P. performed analyses and data interpretation. E.C.,  
623 F.W., J.R.M., L.P. and E.W. wrote the manuscript with contributions of all authors.  
624

625 **FIGURES**

626

627

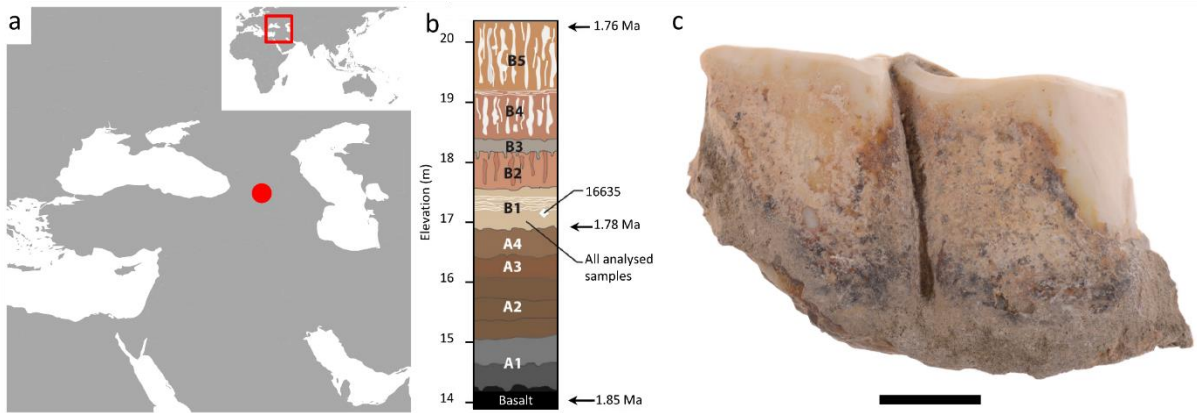

628

629

630

631

632

633

634

**Figure 1. Dmanisi location, stratigraphy, and rhinoceros sample 16635. a)** Geographic location of Dmanisi in the South Caucasus. **b)** Generalized stratigraphic profile indicating origin of the analysed specimens, recovered in layer B1 and dated to between 1.76 and 1.78 Ma. **c)** Isolated left lower molar (m1 or m2; GNM Dm.5/157-16635) of *Stephanorhinus* ex gr. *etruscus-hundsheimensis*, from Dmanisi (labial view). Scale bar: 1 cm.

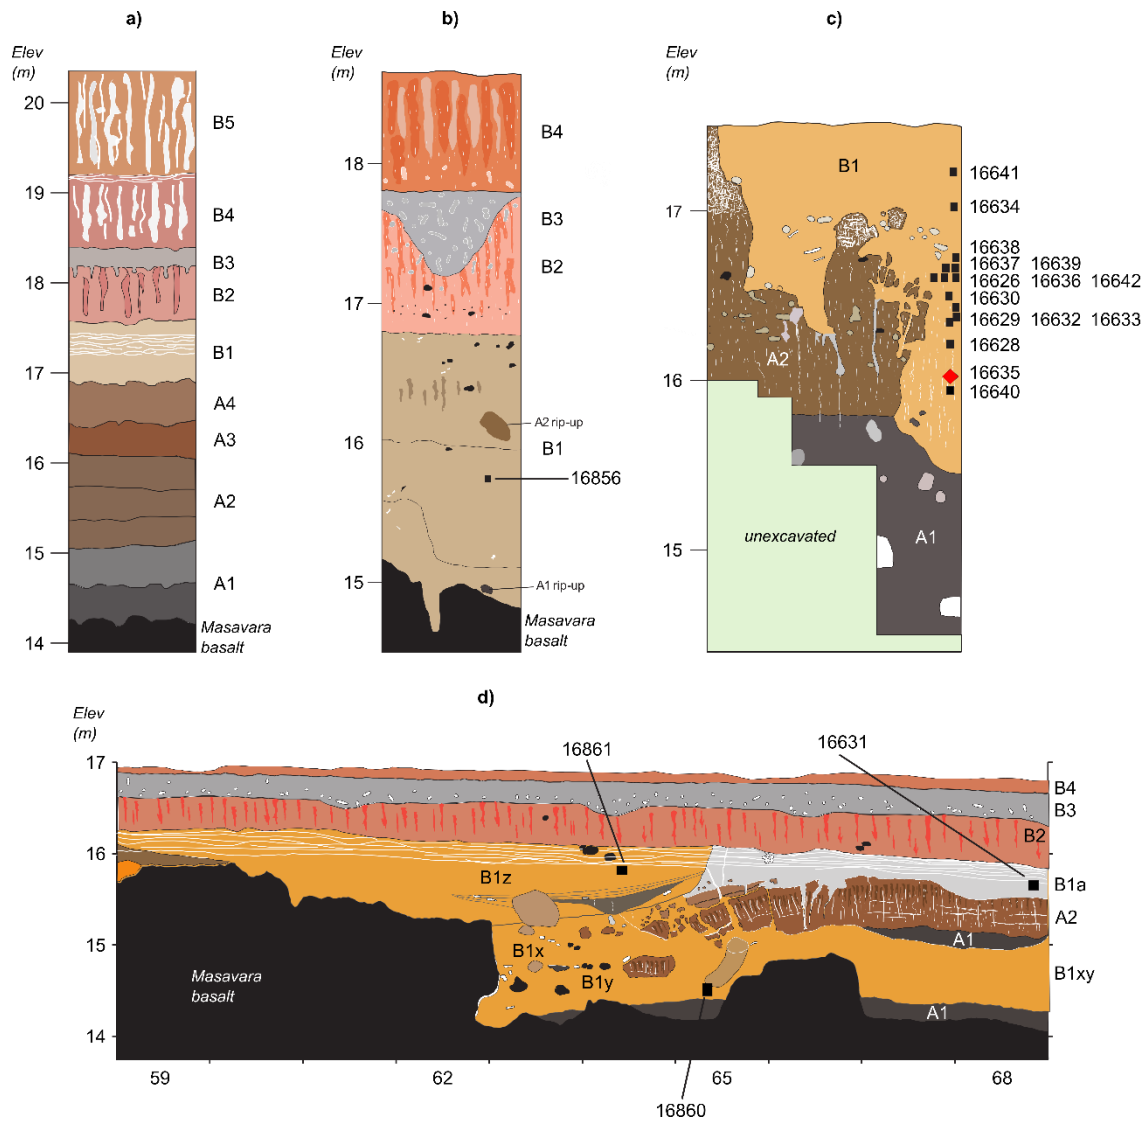

635  
 636 **Figure 2. Generalized stratigraphic profiles for Dmanisi, indicating sample origins.** a) Type section  
 637 of Dmanisi in the M5 Excavation block. b) Stratigraphic profile of excavation area M6. M6 preserves  
 638 a larger gully associated with the pipe-gully phase of stratigraphic-geomorphic development in  
 639 Stratum B1. The thickness of Stratum B1 gully fill extends to the basalt surface, but includes “rip-  
 640 ups” of Strata A1 and A2, showing that B1 deposits post-date Stratum A. c) Stratigraphic section of  
 641 excavation area M17. Here, Stratum B1 was deposited after erosion of Stratum A deposits. The  
 642 stratigraphic position of the *Stephanorhinus* sample 16635 is highlighted with a red diamond. The  
 643 Masavara basalt is ca. 50 cm below the base of the shown profile. d) Northern section of Block 2.  
 644 Following collapse of a pipe and erosion to the basalt, the deeper part of this area was filled with  
 645 local gully fill of Stratum B1/x/y/z. Note the uniform burial of all Stratum B1 deposits by Strata B2-  
 646 B4. Sampled specimens are indicated by five-digit numbers (Tab. 1). Note differences in y-axis for  
 647 elevation. Five additional samples were studied from excavation area R11, stratigraphic unit B1, not  
 648 shown in a stratigraphic profiles here.

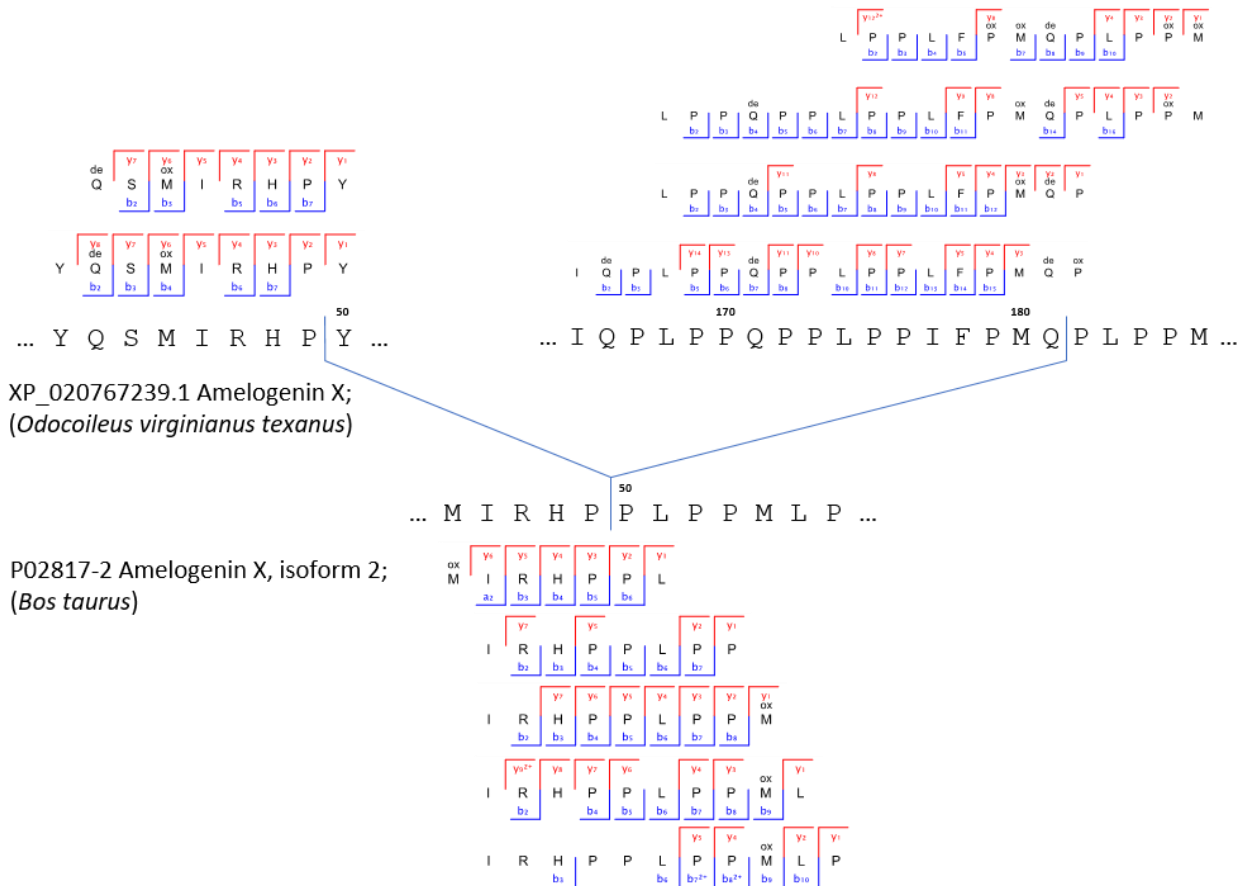

**Figure 3. Peptide and ion fragment coverage of amelogenin X (AMELX) isoforms 1 and 2 from specimen 16856 (Cervidae).** Peptides specific for amelogenin X (AMELX) isoforms 1 and 2 appear in the upper and lower parts of the figure respectively. No amelogenin X isoform 2 is currently reported in public databases for the Cervidae group. Accordingly, the amelogenin X isoform 2-specific peptides were identified by MaxQuant spectral matching against bovine (*Bos Taurus*) amelogenin X isoform 2 (UniProt accession number P02817-2). Amelogenin X isoform 2, also known as leucine-rich amelogenin peptide (LRAP), is a naturally occurring alternative Amelogenin X isoform from the translation product of an alternatively spliced transcript.



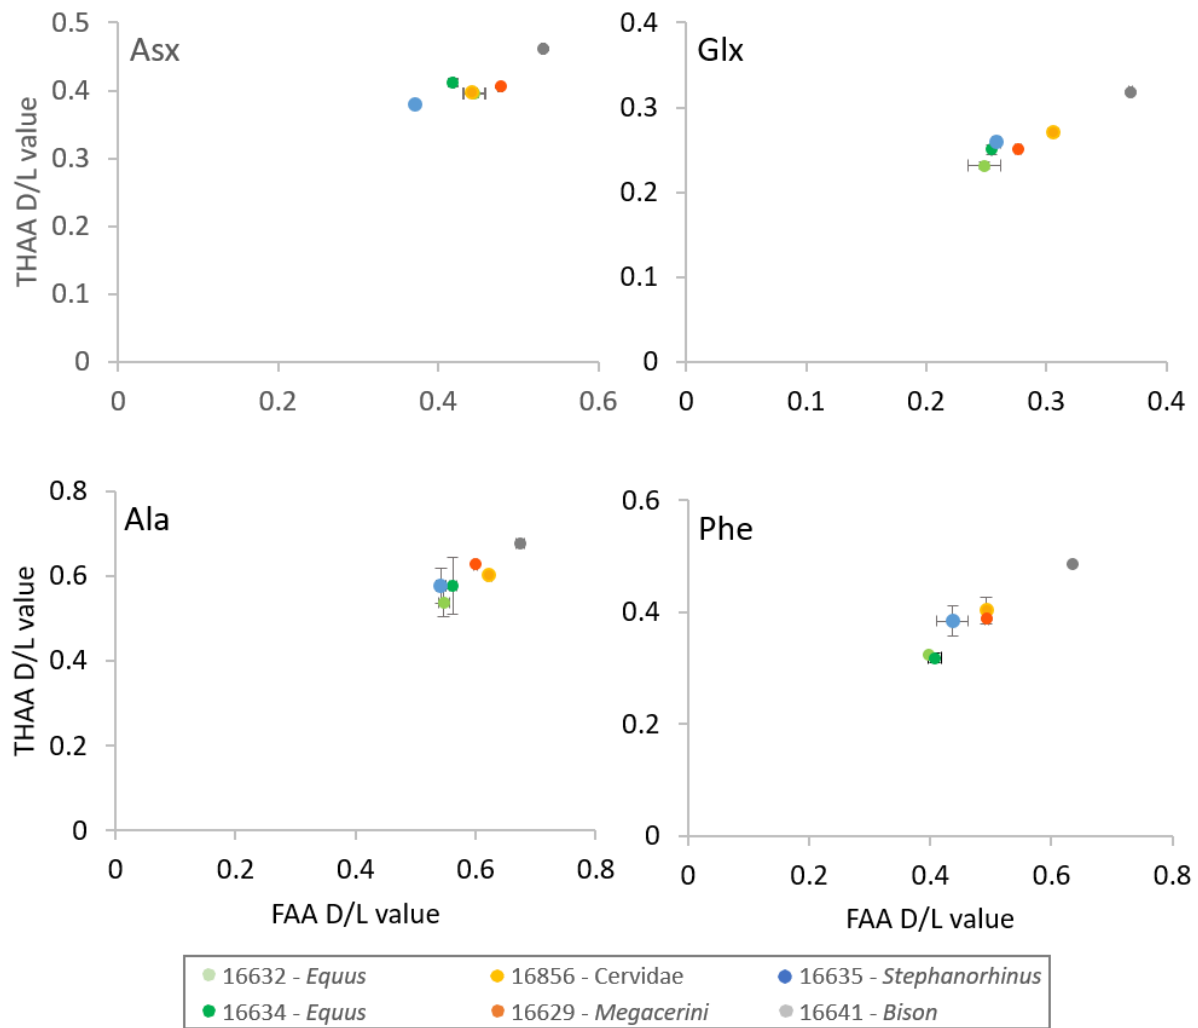

659

660

661 **Figure 4. Amino Acid Racemisation.** Extent of intra-crystalline racemization for four amino acids

662 (Asx, Glx, Ala and Phe). Error bars indicate one standard deviation based on preparative replicates

663 (n=2). "Free" amino acids (FAA) on the x-axis, "total hydrolysable" amino acids (THAA) on the y-axis.

664

664

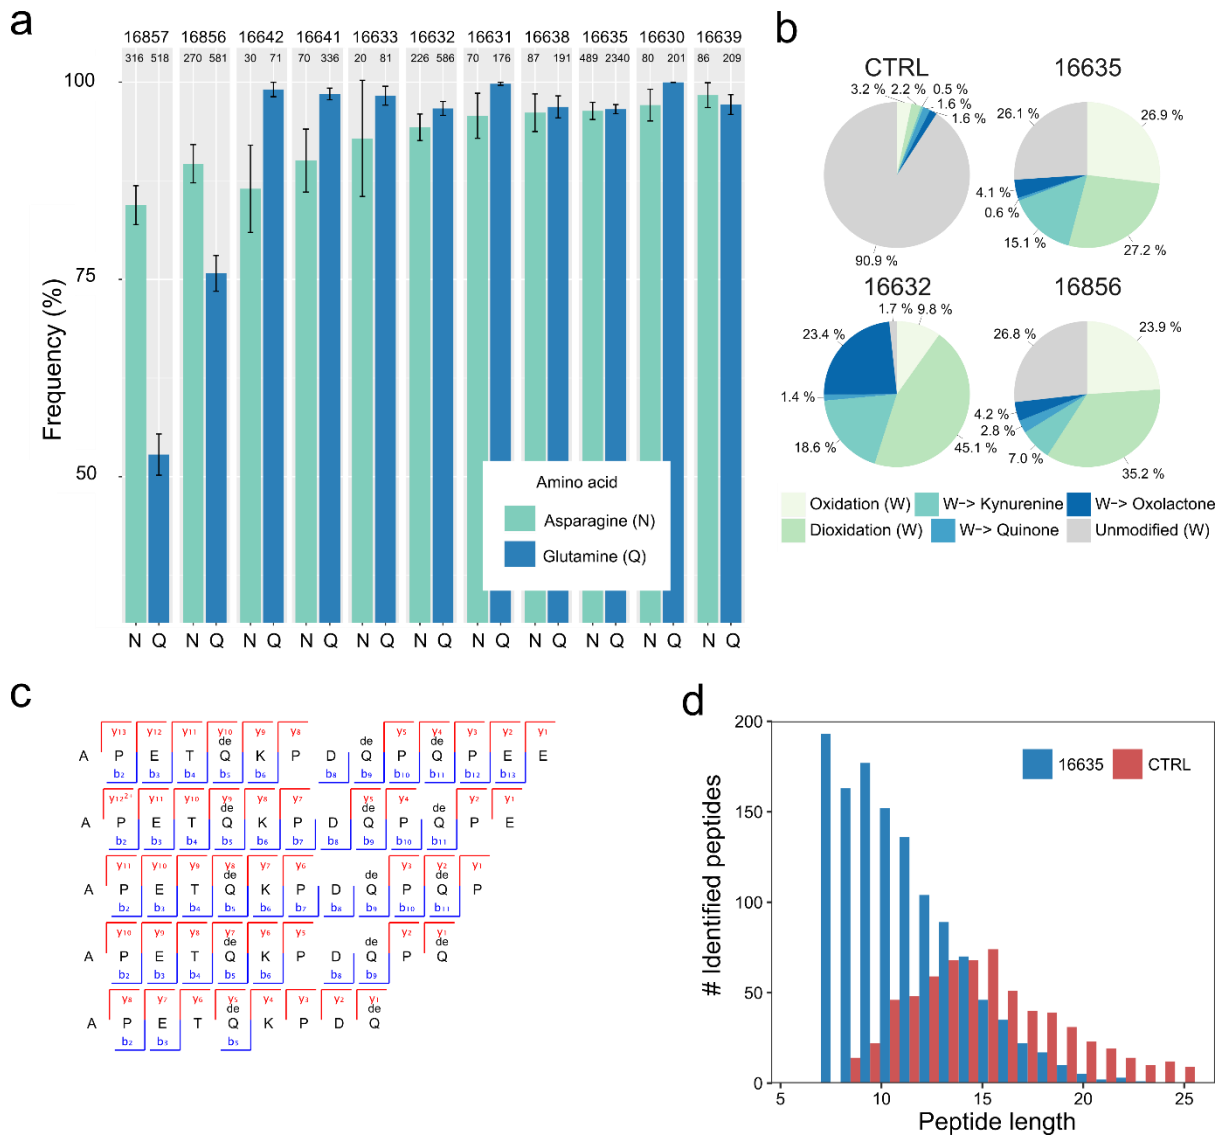

665  
 666 **Figure 5. Enamel proteome degradation.** **a)** Deamidation of asparagine (N) and glutamine (Q) amino  
 667 acids. Error bars indicate confidence interval around 1000 bootstrap replicates. Numeric sample  
 668 identifiers are shown at the very top, while the number of peptides used for the calculation are  
 669 indicated for each bar. **b)** Extent of tryptophan (W) oxidation leading to several diagenetic products,  
 670 measured as relative spectral counts. **c)** Peptide alignment (positions 124-137, enamelins) for acid  
 671 demineralisation without enzymatic digestion. **d)** Barplot of peptide length distribution of  
 672 Pleistocene *Stephanorhinus* ex gr. *etruscus-hundsheimensis* (16635) and Medieval (CTRL)  
 673 undigested ovicaprine dental enamel proteomes, extracted and analysed in an identical manner.  
 674

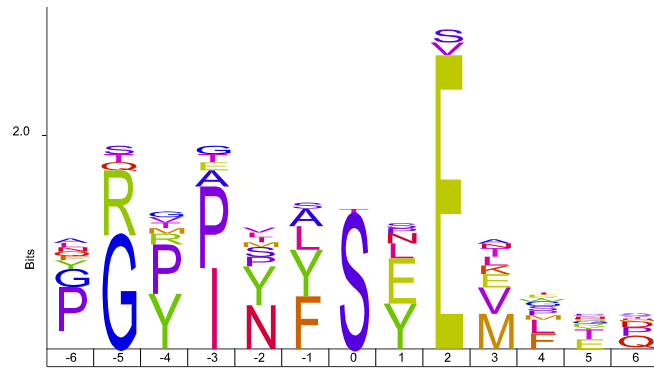

675

676

677

678

679

680

**Figure 6. Sequence motif analysis of ancient enamel proteome phosphorylation.** The identified S-x-E/phS motif is recognised by the secreted kinases of the Fam20C family, which are dedicated to the phosphorylation of extracellular proteins and involved in regulation of biomineralization<sup>26</sup>. See Fig. 7 for spectral examples of both S-x-E and S-x-phS phosphorylated motifs.

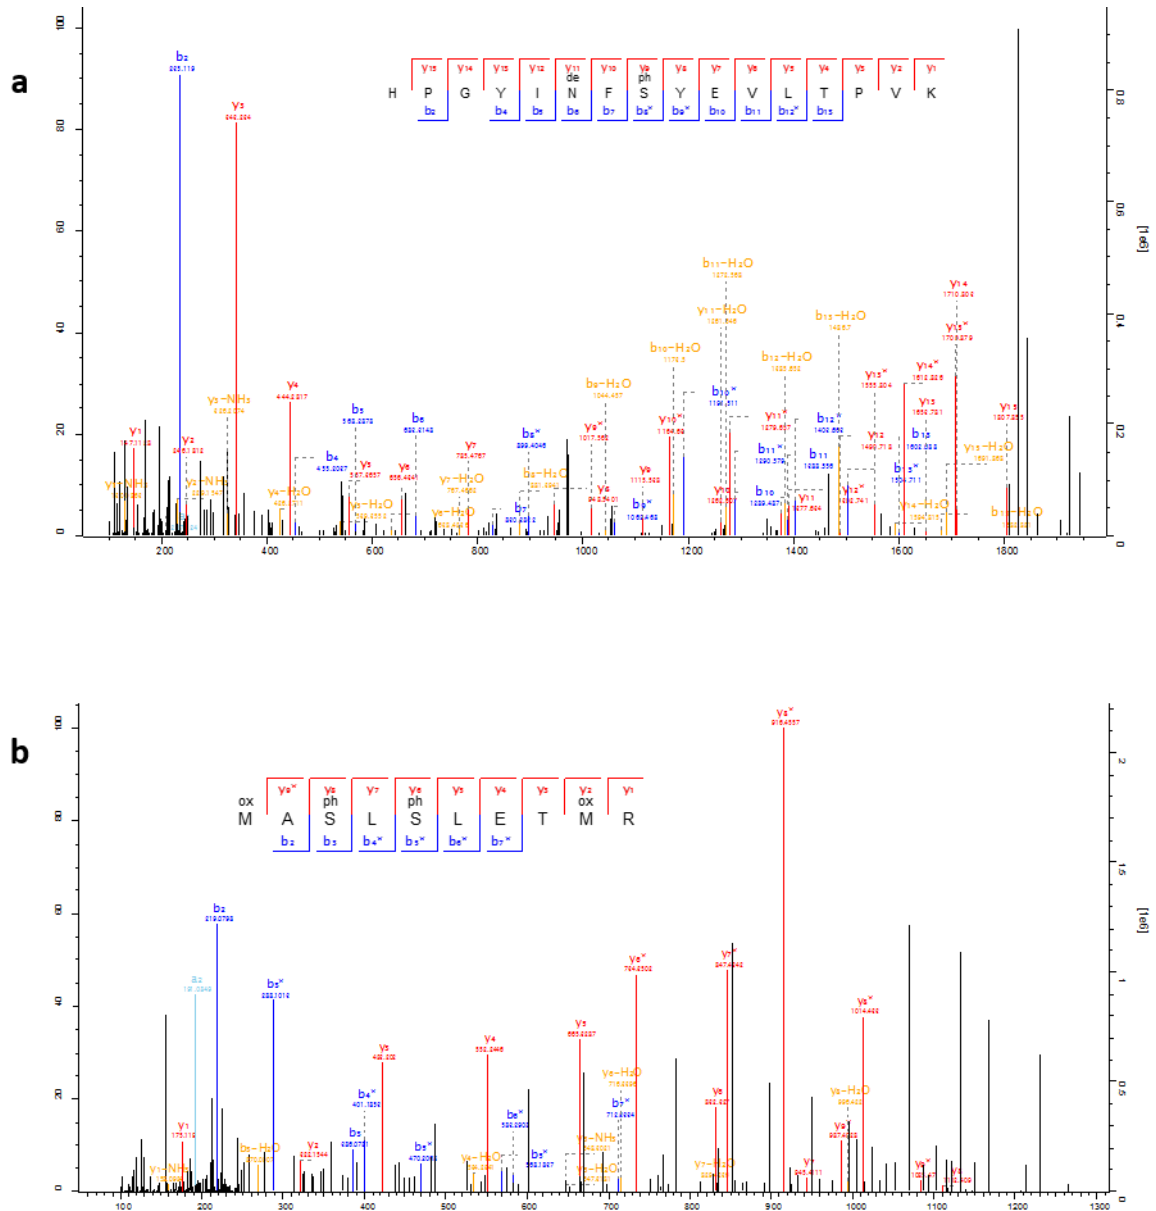

681  
 682 **Figure 7. Ancient enamel proteome phosphorylation.** Annotated example spectra including  
 683 phosphorylated serines (phS) in the S-x-E motif (**a**; AMEL), and in the S-x-phS motif (**b**; AMBN), as  
 684 well as deamidated asparagine (deN). Icelogo analysis of all phosphorylated amino acids indicates  
 685 the majority derive from Fam20C kinase activity with a specificity for the phosphorylation of S-x-E  
 686 or S-x-phS motifs (see Fig. 6).  
 687

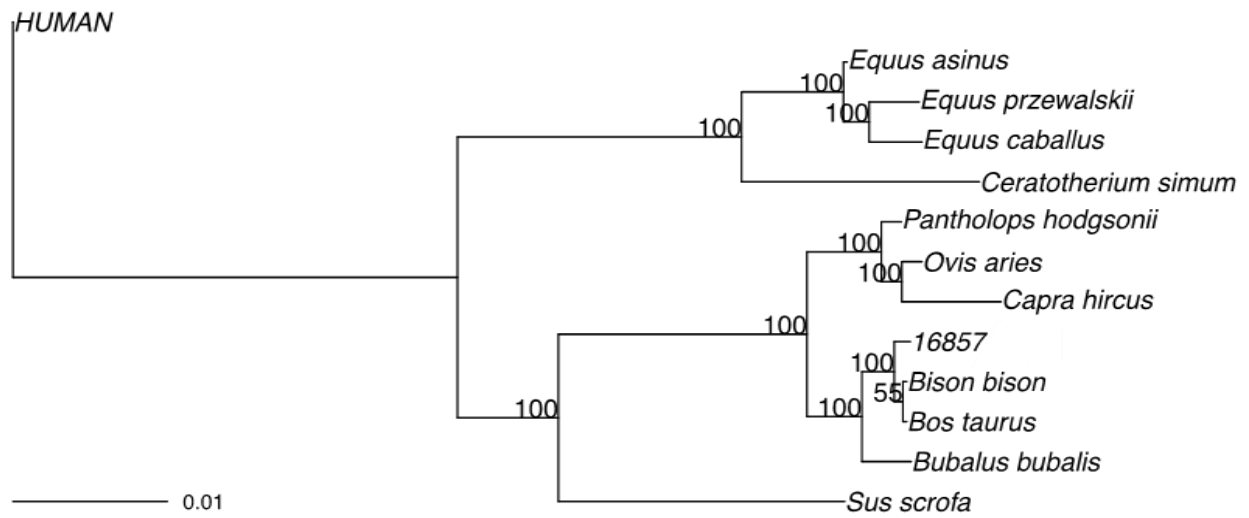

688  
689  
690  
691  
692  
693

**Figure 8. Phylogenetic relationships between the comparative reference dataset and sample 16857.** Consensus tree from Bayesian inference. The posterior probability of each bipartition is shown as a percentage to the left of each node. For all panels, we show a scale for estimated branch lengths.

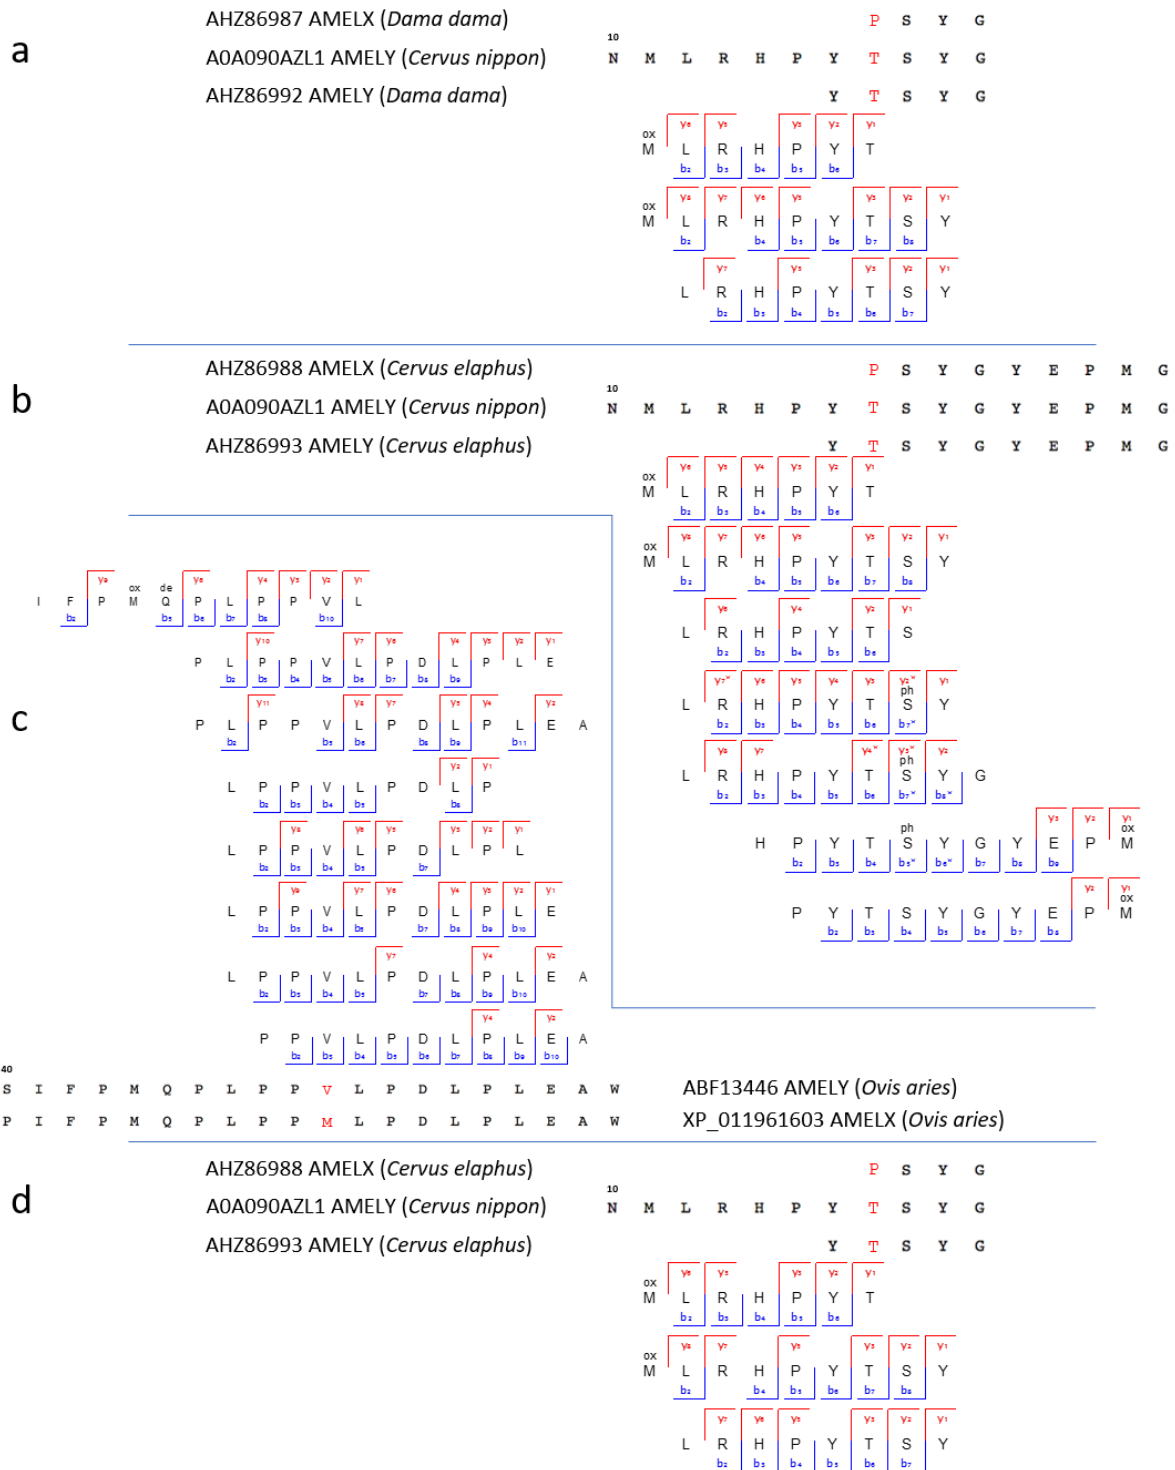

694  
695  
696  
697  
698  
699

**Figure 9. Amelogenin Y-specific matches. a)** Sample 16630, Cervidae. **b)** Sample 16631, Cervidae. **c)** Sample 16639, Bovidae. **d)** Sample 16856, Cervidae. Note the presence of deamidated glutamines (deQ) and asparagines (deN), oxidated methionines (oxM), and phosphorylated serines (phS) in several of the indicated  $\gamma$ - and  $b$ -ion series.

700

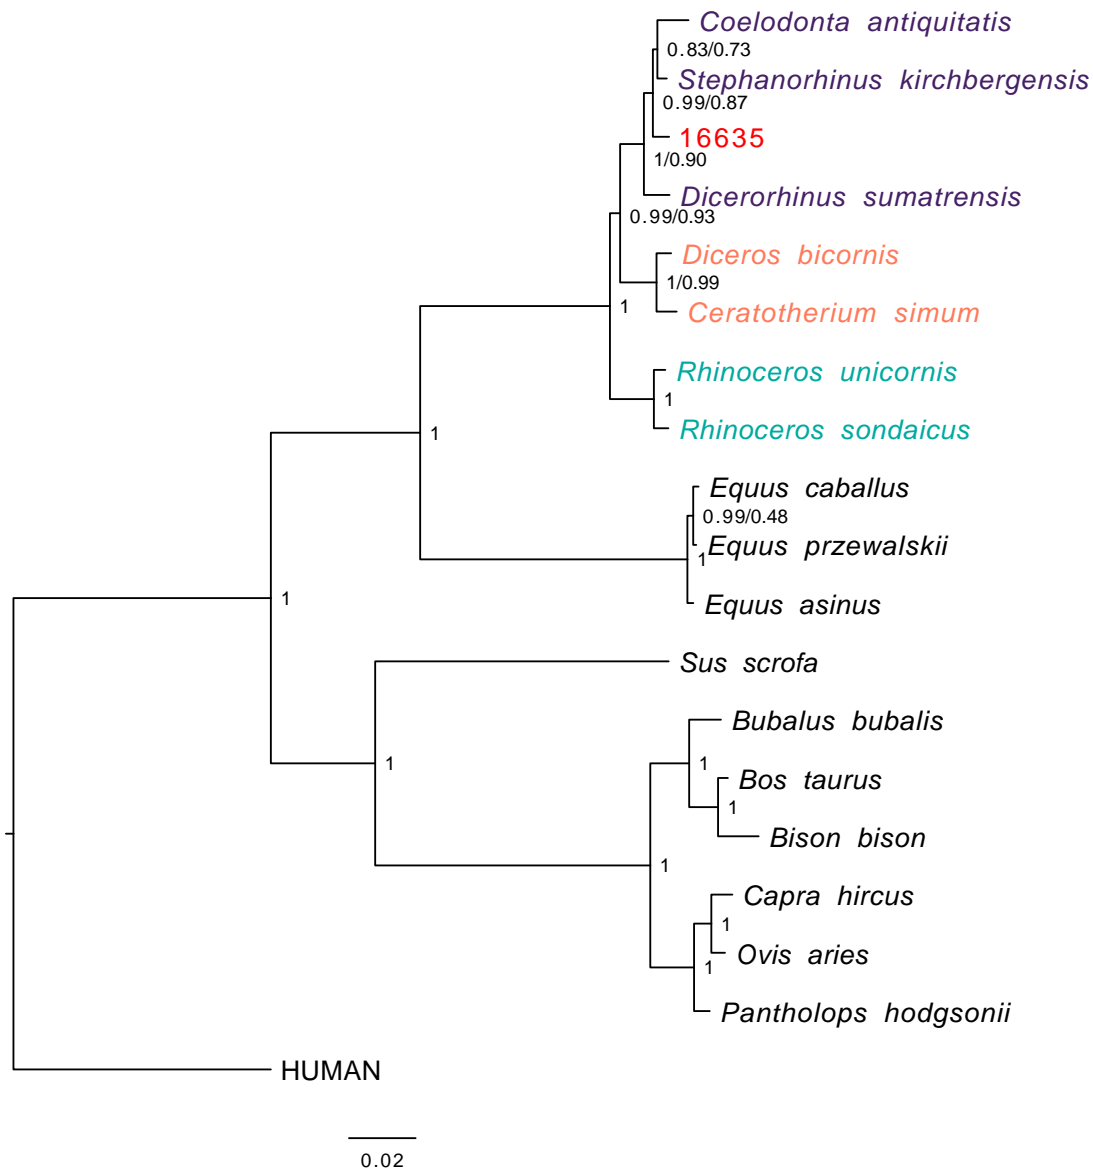

701

702

703

704

705

706

707

708

709

710

**Figure 10. Phylogenetic relationships between the comparative enamel proteome dataset and specimen 16635 (*Stephanorhinus ex gr. etruscus-hundsheimensis*).** Consensus tree from Bayesian inference on the concatenated alignment of six enamel proteins and using *Homo sapiens* as an outgroup. For each bipartition, we show the posterior probability obtained from the Bayesian inference. Additionally, for bipartitions where the Bayesian and the Maximum-likelihood inference support are different, we show (right) the support obtained in the latter. Scale indicates estimated branch lengths. Colours indicate the three main rhinoceros clades: Sumatran-extinct (purple), African (orange) and Indian-Javan (green), as well as the specimen 16635 (red).

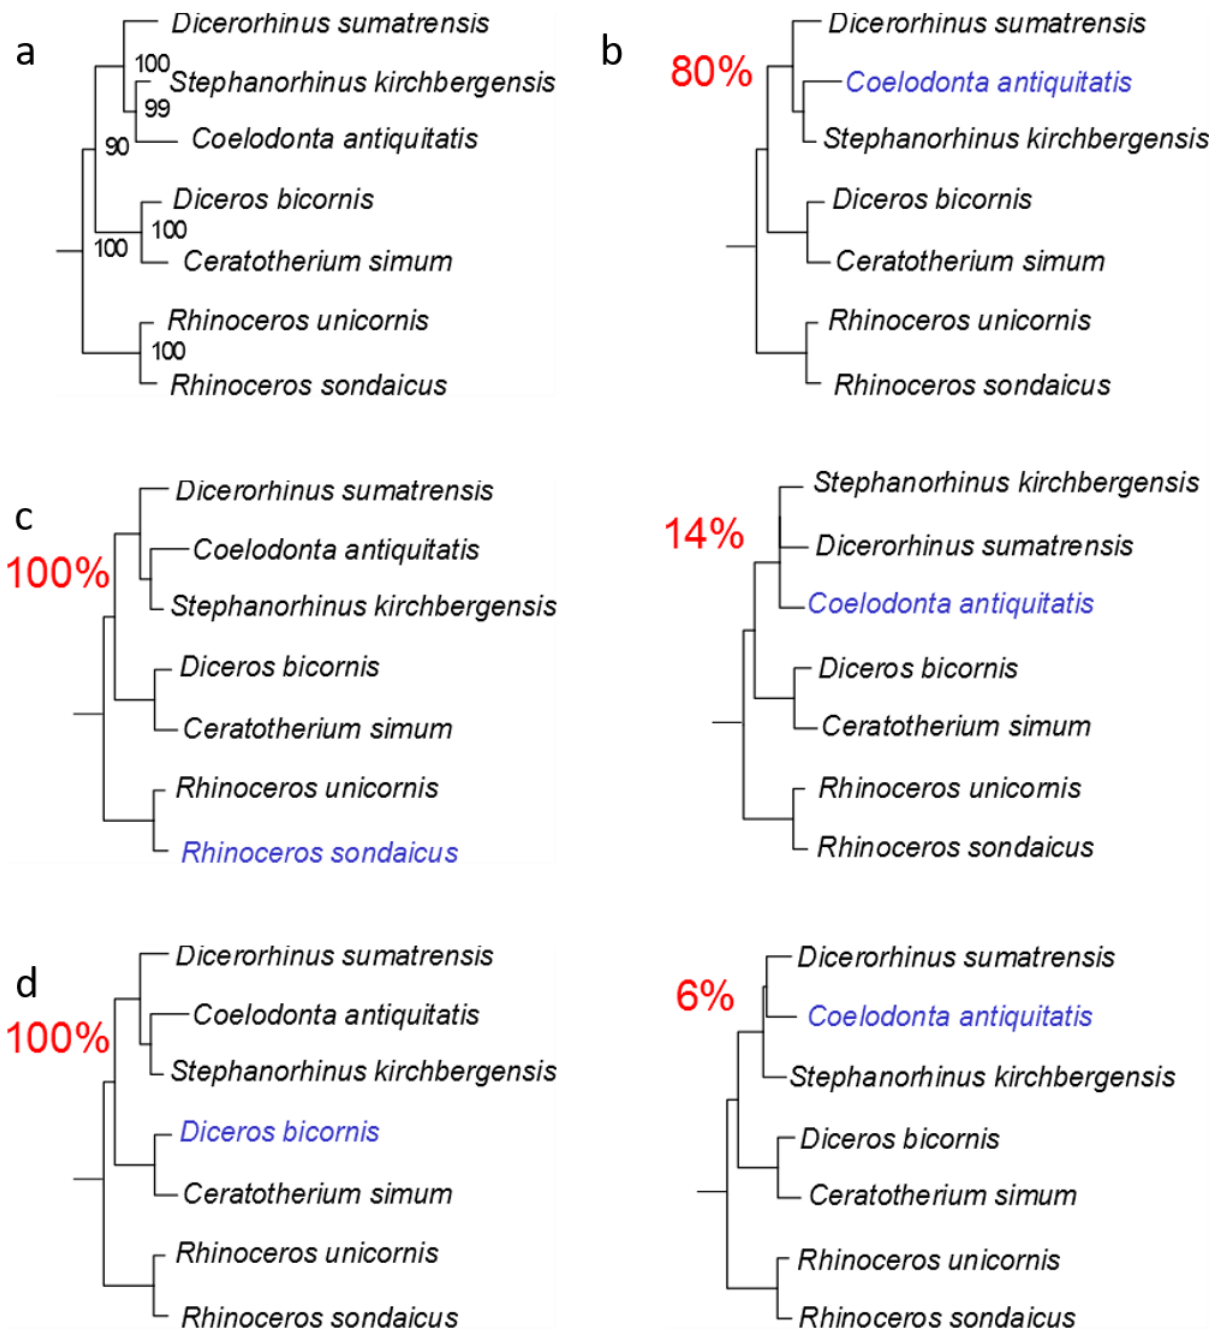

711  
712  
713  
714  
715  
716  
717  
718  
719

**Figure 11. Effect of the missingness in the tree topology. a)** Maximum-likelihood phylogeny obtained using PhyML and the protein alignment excluding the ancient Dmanisi rhinoceros. **b)** Topologies obtained from 100 random replicates of the Woolly rhinoceros (*Coelodonta antiquitatis*). Each replicate was added a similar amount of missing sites as in the Dmanisi sample (72.4% missingness). The percentage shown for each topology indicates the number of replicates in which that particular topology was recovered. **c)** Similar to **b**, but for the Javan rhinoceros (*Rhinoceros sondaicus*). **d)** Similar to **b**, but for the black rhinoceros (*Diceros bicornis*).



720  
721  
722

## TABLES

| n. | CGG reference number | GNM specimen field number   | Year of finding | Anatomical identification                      | Order          | Family         | Species*                       |
|----|----------------------|-----------------------------|-----------------|------------------------------------------------|----------------|----------------|--------------------------------|
| 1  | CGG_1_016486         | Dm.bXI.sqA6.V...            | 1984            | P4 sin.                                        | Camivora       | Canidae        | <i>Canis etruscus</i>          |
| 2  | CGG_1_016626         | Dm.6/154.2/4.A4.17          | 2014            | tibia sin.                                     | Artiodactyla   | Indet.         | Indet.                         |
| 3  | CGG_1_016628         | Dm.7/154.2.A2.27            | 2014            | mc III&IV dex.                                 | Artiodactyla   | Cervidae       | Tribe Megacerini               |
| 4  | CGG_1_016629         | Dm.5/154.3.A4.32            | 2014            | hemimandible sin. with dp2, dp3, dp4, m1       | Artiodactyla   | Cervidae       | Tribe Megacerini               |
| 5  | CGG_1_016630         | Dm.6/151.4.A4.12            | 2014            | hemimandible dex. with p2-m3                   | Artiodactyla   | Cervidae       | <i>Pseudodama nestii</i>       |
| 6  | CGG_1_016631         | Dm.69/64.3.B1.53            | 2014            | maxilla sin. with P3                           | Artiodactyla   | Cervidae       | Tribe Megacerini               |
| 7  | CGG_1_016632         | Dm.5/154.2.A4.38            | 2014            | i3 dex.                                        | Perissodactyla | Equidae        | <i>Equus stenoris</i>          |
| 8  | CGG_1_016633         | Dm.5/153.3.A2.33            | 2014            | mc III & mc II sin.                            | Perissodactyla | Equidae        | <i>Equus stenoris</i>          |
| 9  | CGG_1_016634         | Dm.7/151.2.B1/A4.1          | 2014            | m/1 or m/2 dex.                                | Perissodactyla | Equidae        | <i>Equus stenoris</i>          |
| 10 | CGG_1_016635         | Dm.5/157.profile cleaning   | 2014            | m/1 sin.                                       | Perissodactyla | Rhinocerotidae | <i>Stephanorhinus</i> sp.      |
| 11 | CGG_1_016636         | Dm.6/153.1.A4.13            | 2014            | tibia dex.                                     | Perissodactyla | Rhinocerotidae | Rhinocerotini indet.           |
| 12 | CGG_1_016637         | Dm.7/154.2.A4.8             | 2014            | mt III&IV sin.                                 | Artiodactyla   | Bovidae        | Tribe Ovisovini? Nemorhaedini? |
| 13 | CGG_1_016638         | Dm.5/154.1.B1.1             | 2014            | hemimandible dex. with p3-m3                   | Artiodactyla   | Bovidae        | Tribe Nemorhaedini             |
| 14 | CGG_1_016639         | Dm.8/154.4.A4.22            | 2014            | maxilla dex. with P2-M2                        | Artiodactyla   | Bovidae        | Tribe Ovisovini? Nemorhaedini? |
| 15 | CGG_1_016640         | Dm.6/151.2.A4.97            | 2014            | mt III&IV sin.                                 | Artiodactyla   | Bovidae        | <i>Bison georgicus</i>         |
| 16 | CGG_1_016641         | Dm.8/152.3.B1.2             | 2014            | m3 dex.                                        | Artiodactyla   | Bovidae        | <i>Bison georgicus</i>         |
| 17 | CGG_1_016642         | Dm.8/153.4.A4.5             | 2014            | hemimandible sin. with p1-m2                   | Camivora       | Canidae        | <i>Canis etruscus</i>          |
| 18 | CGG_1_016856         | Dm.M6/7.II.296              | 2006            | m2 sin.                                        | Artiodactyla   | Cervidae       | Tribe Megacerini               |
| 19 | CGG_1_016857         | Dm.bXI.profile cleaning     |                 | long bone fragment of a herbivore              | Indet.         | Indet.         | Indet.                         |
| 20 | CGG_1_016858         | Dm.bXI.North.B1a.colleciton | 2006            | metapodium fragment                            | Artiodactyla   | Cervidae       | Tribe Megacerini               |
| 21 | CGG_1_016859         | D4.collection               |                 | fragments of pelvis and ribs of a large mammal | Indet.         | Indet.         | Indet.                         |
| 22 | CGG_1_016860         | Dm.65/62.1.A1.collection    | 2011            | P4 sin.                                        | Artiodactyla   | Cervidae       | Tribe Megacerini               |
| 23 | CGG_1_016861         | Dm.64/63.1.B1z.collection   | 2010            | fragment of an upper tooth                     | Perissodactyla | Equidae        | <i>Equus stenoris</i>          |

723  
724  
725  
726  
727  
728

**Table 1. Fossil specimens selected for ancient protein and DNA extraction.** For each specimen, the Centre for GeoGenetics (CGG) reference number and the Georgian National Museum (GNM) specimen field number are reported. \*or the narrowest possible taxonomic identification achievable using traditional comparative anatomy methods.

| Specimen           | Protein Name          | Sequence length (aa) | Razor and unique peptides | Matched spectra* | Coverage after MaxQuant searches (%) | Final coverage after MaxQuant and PEAKS searches (%) | Final coverage (aa) |
|--------------------|-----------------------|----------------------|---------------------------|------------------|--------------------------------------|------------------------------------------------------|---------------------|
| 16628              | Collagen alpha-1(I)   | 1158                 | 5                         | 8                | 3.2                                  | 3.2                                                  | 37                  |
| 16629              | Amelogenin X          | 209                  | 79                        | 190              | 36.8                                 | 36.8                                                 | 77                  |
|                    | Ameloblastin          | 440                  | 51                        | 84               | 25.0                                 | 25.0                                                 | 110                 |
|                    | Enamelin              | 1129                 | 58                        | 133              | 6.2                                  | 6.5                                                  | 73                  |
|                    | Collagen alpha-1(I)   | 1453                 | 3                         | 3                | 2.0                                  | 2.0                                                  | 29                  |
|                    | Collagen alpha-1(III) | 1464                 | 2                         | 3                | 1.4                                  | 1.4                                                  | 20                  |
|                    | Amelotin              | 212                  | 2                         | 2                | 4.7                                  | 4.7                                                  | 10                  |
| 16630              | Enamelin              | 1129                 | 180   3                   | 530   5          | 11.8   2.7                           | 15.4                                                 | 174                 |
|                    | Ameloblastin          | 440                  | 105                       | 231              | 30.9                                 | 31.4                                                 | 138                 |
|                    | Amelogenin X          | 213                  | 116                       | 529              | 62.0                                 | 62.9                                                 | 134                 |
|                    | Amelogenin Y          | 192                  | 4                         | 9                | 13.0                                 | 22.9                                                 | 44                  |
|                    | Amelotin              | 212                  | 5                         | 6                | 8.0                                  | 8.0                                                  | 17                  |
| 16631              | Enamelin              | 916                  | 175                       | 751              | 11.0                                 | 11.7                                                 | 107                 |
|                    | Amelogenin X          | 213                  | 156                       | 598              | 48.8                                 | 61.5                                                 | 131                 |
|                    | Amelogenin Y          | 90                   | 5                         | 18               | 15.6                                 | 25.6                                                 | 23                  |
|                    | Ameloblastin          | 440                  | 71                        | 133              | 24.1                                 | 25.2                                                 | 111                 |
|                    | MMP20                 | 482                  | 2                         | 2                | 3.9                                  | 3.9                                                  | 19                  |
| 16632              | Enamelin              | 1144                 | 401                       | 2160             | 17.9                                 | 19.1                                                 | 219                 |
|                    | Amelogenin X          | 192                  | 280                       | 960              | 84.4                                 | 84.4                                                 | 162                 |
|                    | MMP20                 | 424                  | 49                        | 67               | 33.3                                 | 33.3                                                 | 141                 |
|                    | Serum albumin         | 607                  | 11                        | 18               | 6.1                                  | 6.1                                                  | 37                  |
|                    | Collagen alpha-1(I)   | 1513                 | 4                         | 4                | 2.6                                  | 2.6                                                  | 40                  |
| 16634              | Amelogenin X          | 185                  | 68                        | 157              | 53.5                                 | 53.5                                                 | 99                  |
|                    | Ameloblastin          | 440                  | 47                        | 58               | 23.4                                 | 23.4                                                 | 103                 |
|                    | Enamelin              | 920                  | 33                        | 87               | 4.5                                  | 4.5                                                  | 41                  |
|                    | MMP20                 | 483                  | 4                         | 4                | 5.6                                  | 5.6                                                  | 27                  |
| 16635              | Amelogenin X          | 206                  | 394   3                   | 2793   5         | 73.8   7.8                           | 85.9                                                 | 177                 |
|                    | Enamelin              | 1150                 | 382   2                   | 2966   2         | 18.3   1.6                           | 25.1                                                 | 289                 |
|                    | Ameloblastin          | 442                  | 131                       | 463              | 31.3                                 | 39.3                                                 | 166                 |
|                    | Amelotin              | 267                  | 26                        | 148              | 9.9                                  | 9.9                                                  | 20                  |
|                    | Serum albumin         | 607                  | 34                        | 64               | 18.5                                 | 24.5                                                 | 149                 |
|                    | MMP20                 | 483                  | 15                        | 25               | 11.8                                 | 15.3                                                 | 74                  |
| 16637              | Collagen alpha-1(I)   | 1453                 | 2                         | 2                | 1.7                                  | 1.7                                                  | 25                  |
|                    | Collagen alpha-1(II)  | 1421                 | 2                         | 2                | 1.9                                  | 1.9                                                  | 27                  |
|                    | Collagen alpha-1(III) | 1464                 | 2                         | 2                | 1.6                                  | 1.6                                                  | 23                  |
|                    | Enamelin              | 1142                 | 2   5                     | 2   5            | 3.6   3.0                            | 3.6                                                  | 41                  |
| 16638              | Enamelin              | 1129                 | 235   7                   | 1155   13        | 11.8   4.7                           | 12.9                                                 | 146                 |
|                    | Amelogenin X          | 192                  | 185   3                   | 734   5          | 52.0   10.9                          | 60.4                                                 | 116                 |
|                    | Ameloblastin          | 440                  | 64   2                    | 120   4          | 30.0   5.7                           | 36.4                                                 | 160                 |
|                    | MMP20                 | 481                  | 6                         | 7                | 8.1                                  | 9.1                                                  | 44                  |
| 16639              | Enamelin              | 1129                 | 202                       | 726              | 12.0                                 | 12.6                                                 | 142                 |
|                    | Amelogenin X          | 213                  | 167                       | 624              | 59.2                                 | 67.6                                                 | 144                 |
|                    | Ameloblastin          | 440                  | 88                        | 155              | 26.8                                 | 30.5                                                 | 134                 |
|                    | Amelogenin Y          | 192                  | 13                        | 13               | 18.8                                 | 18.8                                                 | 36                  |
| 16641              | Amelogenin X          | 213                  | 91                        | 251              | 64.3                                 | 65.3                                                 | 139                 |
|                    | Ameloblastin          | 440                  | 69                        | 122              | 28.9                                 | 28.9                                                 | 127                 |
|                    | Enamelin              | 1129                 | 24                        | 75               | 7.8                                  | 7.8                                                  | 88                  |
|                    | Amelotin              | 212                  | 3                         | 3                | 7.1                                  | 7.1                                                  | 15                  |
| 16642              | Amelogenin X          | 185                  | 89                        | 245              | 42.7                                 | 42.7                                                 | 79                  |
|                    | Enamelin              | 733                  | 14                        | 19               | 2.5                                  | 2.5                                                  | 18                  |
|                    | Ameloblastin          | 421                  | 3                         | 3                | 7.1                                  | 7.1                                                  | 30                  |
|                    | MMP20                 | 483                  | 2                         | 2                | 3.5                                  | 3.5                                                  | 17                  |
| 16856              | Amelogenin X          | 209                  | 66   4                    | 365   25         | 38.8                                 | 45.5                                                 | 95                  |
|                    | Enamelin              | 916                  | 58   13                   | 153   70         | 8.2                                  | 10.2                                                 | 93                  |
|                    | Ameloblastin          | 440                  | 21                        | 31               | 14.8                                 | 14.8                                                 | 65                  |
|                    | Collagen alpha-1(I)   | 1047                 | 8   10                    | 9   11           | 14.5                                 | 16.9                                                 | 177                 |
|                    | Collagen alpha-2(I)   | 1054                 | 4   8                     | 5   9            | 10.6                                 | 10.6                                                 | 112                 |
|                    | Serum albumin         | 583                  | 0   8                     | 0   12           | 16.6                                 | 16.6                                                 | 97                  |
|                    | Amelogenin Y          | 90                   | 3                         | 7                | 10.0                                 | 10.0                                                 | 9                   |
| 16857              | Collagen alpha-1(I)   | 1047                 | 18   14                   | 24   18          | 21.7                                 | 23.4                                                 | 245                 |
|                    | Collagen alpha-2(I)   | 1274                 | 16   11                   | 17   11          | 17.7                                 | 24.3                                                 | 310                 |
| 16860              | Amelogenin X          | 192                  | 46                        | 98               | 30.7                                 | 32.3                                                 | 62                  |
|                    | Ameloblastin          | 440                  | 19                        | 37               | 9.1                                  | 9.1                                                  | 40                  |
|                    | Enamelin              | 900                  | 15                        | 25               | 3.8                                  | 3.8                                                  | 34                  |
| 16861              | Amelogenin X          | 185                  | 14                        | 15               | 36.8                                 | 38.9                                                 | 72                  |
|                    | Ameloblastin          | 343                  | 2                         | 2                | 4.4                                  | 4.4                                                  | 15                  |
|                    | Enamelin              | 915                  | 2                         | 2                | 1.2                                  | 1.2                                                  | 11                  |
| Neg. Contr. Gr. 1: |                       |                      |                           |                  |                                      |                                                      |                     |
| 235, 275, 706      | ND                    |                      |                           |                  |                                      |                                                      |                     |
| Neg. Contr. Gr. 2: |                       |                      |                           |                  |                                      |                                                      |                     |
| 630, 875, 889      | ND                    |                      |                           |                  |                                      |                                                      |                     |
| Neg. Contr. Gr. 3: |                       |                      |                           |                  |                                      |                                                      |                     |
| 1214, 1218         | Amelogenin X          | 122                  | 5                         | 7                | 18.0                                 | 18.0                                                 | 22                  |

729  
730  
731  
732  
733  
734  
735

**Table 2. Proteome composition and coverage.** In those cells reporting two values separated by the “|” symbol, the first value refers to MaxQuant (MQ) searches performed selecting unspecific digestion, while the second value refers to MQ searches performed selecting trypsin digestion. For those cells including one value only, it refers to MaxQuant (MQ) searches performed selecting unspecific digestion. Final amino acid coverage, incorporating both MQ and PEAKS searches, is reported in the last column. \*supporting all peptides.
